# Supplementary material for: Asymmetric Synthesis and Biological Screening of Quinoxaline-Containing Synthetic Lipoxin A4 Mimetics (QNX-sLXms)
Source: PubMed Central journal article supplement (PMC8279484; doi:10.1021/acs.jmedchem.1c00403), 2021-06-17
Supplement: jm1c00403_si_001.pdf [file jm1c00403_si_001.pdf]

## Supporting Information

### Asymmetric synthesis and biological screening of quinoxaline-containing synthetic lipoxin A<sub>4</sub> mimetics (QNX-sLXms)

Monica de Gaetano<sup>a, ‡</sup>, Catherine Tighe<sup>b, ‡</sup>, Kevin Gahan<sup>b</sup>, Andrea Zanetti<sup>b</sup>, Jianmin Chen<sup>c</sup>, Justine Newson<sup>d</sup>, Antonino Cacace<sup>a</sup>, Mariam Marai<sup>a</sup>, Andrew Gaffney<sup>a</sup>, Eoin Brennan<sup>a</sup>, Phillip Kantharidis<sup>e</sup>, Mark E. Cooper<sup>e</sup>, Xavier Leroy<sup>f</sup>, Mauro Perretti<sup>c</sup>, Derek Gilroy<sup>d</sup>, Catherine Godson<sup>\*a</sup> and Patrick J. Guiry<sup>\*, b</sup>.

*[a] School of Medicine, Diabetes Complications Research Centre, UCD Conway Institute, University College Dublin, Belfield, Dublin D04 N2E5, Ireland.*

*[b] Centre for Synthesis and Chemical Biology, School of Chemistry, UCD Conway Institute, University College Dublin, Belfield, Dublin D04 N2E5, Ireland.*

*[c] William Harvey Research Institute, Queen Mary University London, London, EC1M 6BQ, UK.*

*[d] Centre for Clinical Pharmacology, UCL, London, WC1E 6JF, UK.*

*[e] Department of Diabetes, Central Clinical School, Monash University, Melbourne, VIC 3004, Australia.*

*[f] Domain Therapeutics SA, 67400 Strasbourg - Illkirch - France.*

<sup>‡</sup> *These authors contributed equally to this body of work.*

<sup>\*</sup> *Corresponding authors: [p.guiry@ucd.ie](mailto:p.guiry@ucd.ie); [catherine.godson@ucd.ie](mailto:catherine.godson@ucd.ie)*

## Table of Contents

|                                                                                                                                              |             |
|----------------------------------------------------------------------------------------------------------------------------------------------|-------------|
| <sup>1</sup> H and <sup>13</sup> C NMR Spectra                                                                                               | Pages 3-20  |
| Chromatograms                                                                                                                                | Pages 21-29 |
| Supplementary Tables (ST) and Figures (SF) List                                                                                              | Page 30     |
| ST1: PD Analysis Coding                                                                                                                      | Page 31     |
| ST2: PD Analysis of the Effects of QNX-sLXms on NF-κB Activity                                                                               | Page 32     |
| ST3: PD Analysis of the Effects of QNX-sLXms on Cytokine Release                                                                             | Pages 33-34 |
| ST4: Safety Index of QNX-sLXms                                                                                                               | Page 35     |
| ST5: PD Analysis of the Effects of ( <i>R</i> )- <b>6</b> on Macrophage Phagocytosis                                                         | Page 36     |
| ST6: Effect of QNX-sLXm ( <i>R</i> )- <b>6</b> on Murine Carregeenan-induced Phagocytosis                                                    | Page 37     |
| ST7: PD Analysis of the Effects on Intracellular Ca Mobilization of ( <i>R</i> )- <b>6</b>                                                   | Page 38     |
| ST6: Effect of QNX-sLXm ( <i>R</i> )- <b>6</b> on Murine Carregeenan-induced Phagocytosis                                                    | Page 37     |
| SF1: Effect of Series ( <b>17</b> ), ( <b>7</b> ), ( <b>8</b> ) of of QNX-sLXms on LPS-induced NF-κB Driven Luciferase Activity in Monocytes | Pages 39-40 |
| SF2: Effect of Series ( <b>6</b> ) of of QNX-sLXms on LPS-induced Pro-inflammatory Cytokine Release in Monocytes                             | Pages 41-42 |
| SF3: Effect of Series ( <b>7</b> ) and ( <b>8</b> ) of of QNX-sLXms on LPS-induced NF-κB Driven Luciferase Activity in Monocytes             | Pages 43-44 |
| SF4: Intrinsic Cytotoxic Profile of Series ( <b>17</b> ), ( <b>7</b> ), ( <b>8</b> ) of of QNX-sLXms                                         | Pages 45-46 |
| SF5: Extrinsic Cytotoxic Profile of Series ( <b>17</b> ), ( <b>7</b> ), ( <b>8</b> ) of of QNX-sLXms                                         | Pages 47-48 |
| SF6: Cell Model for Intracellular Calcium Flux Measurement                                                                                   | Pages 49-50 |
| SF7: Intracellular Calcium Flux Kinetic Traces                                                                                               | Pages 51-53 |

# $^1\text{H}$ and $^{13}\text{C}$ NMR Spectra

$^1\text{H}$  NMR (400 MHz,  $\text{CDCl}_3$ )

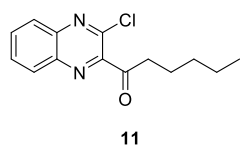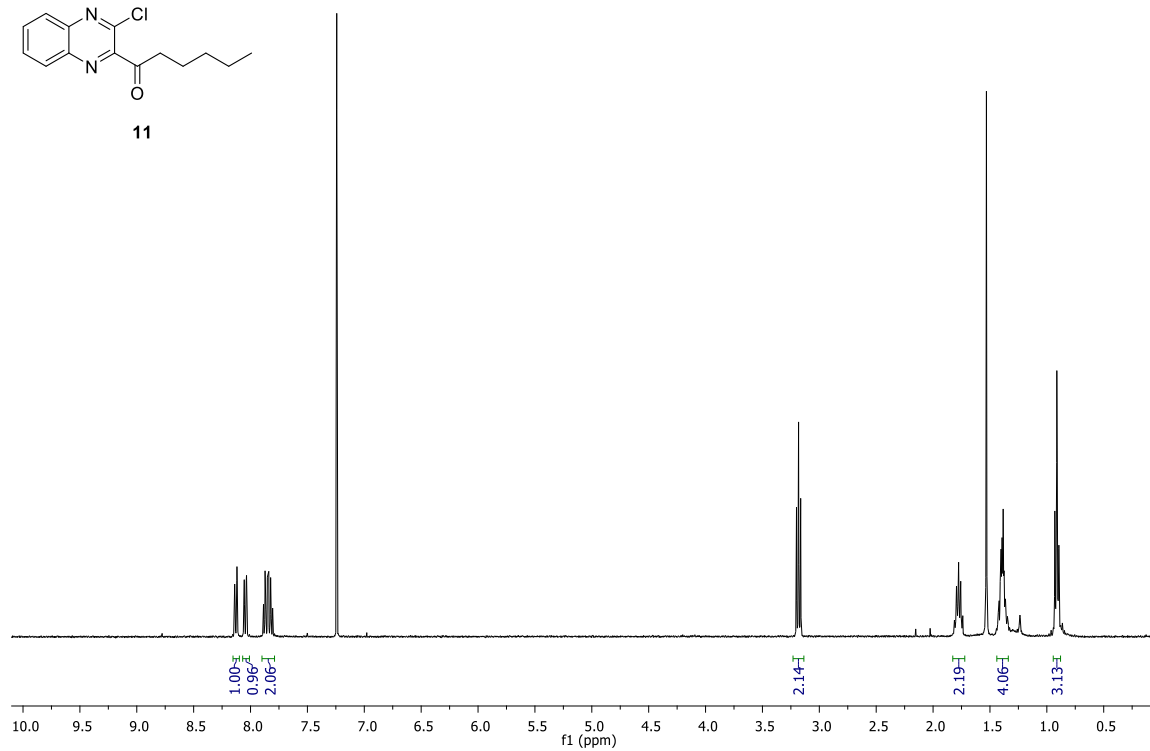

$^{13}\text{C}$  NMR (101 MHz,  $\text{CDCl}_3$ )

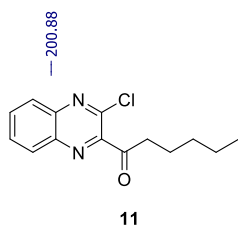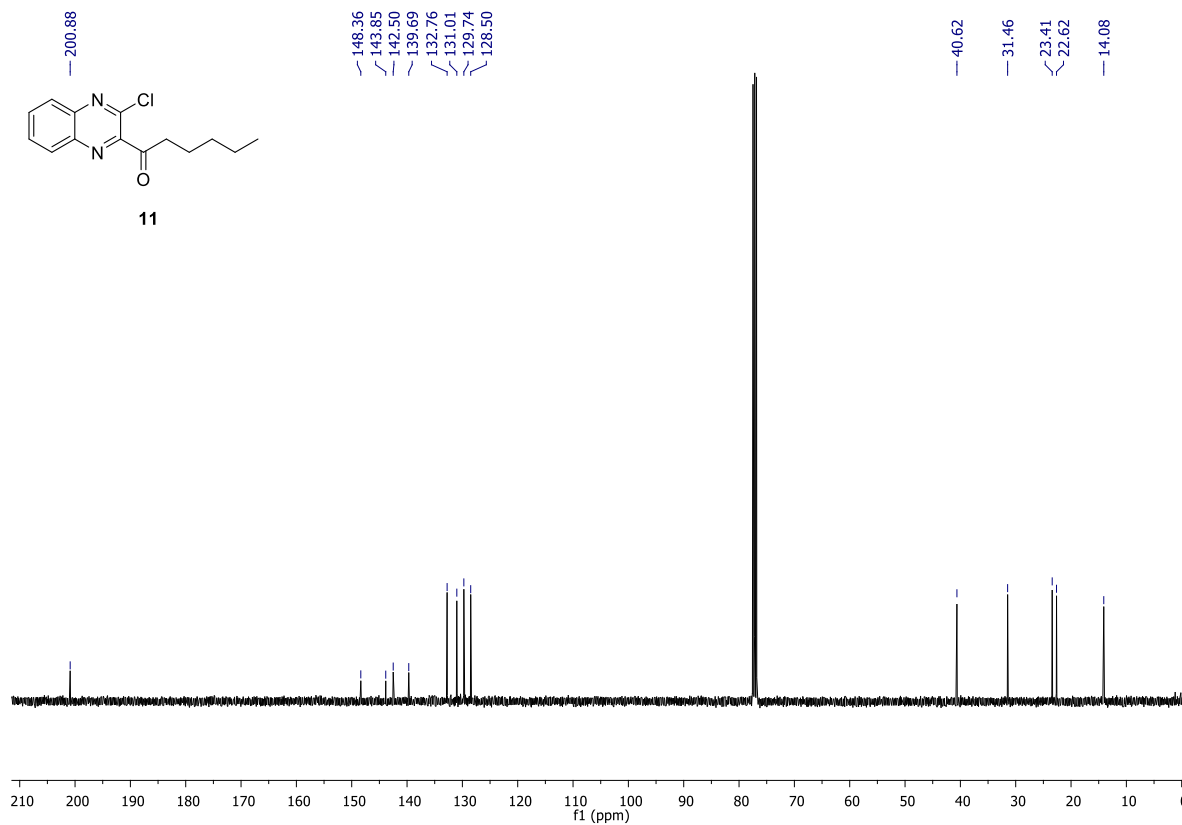

$^1\text{H}$  NMR (400 MHz,  $\text{CDCl}_3$ )

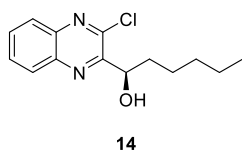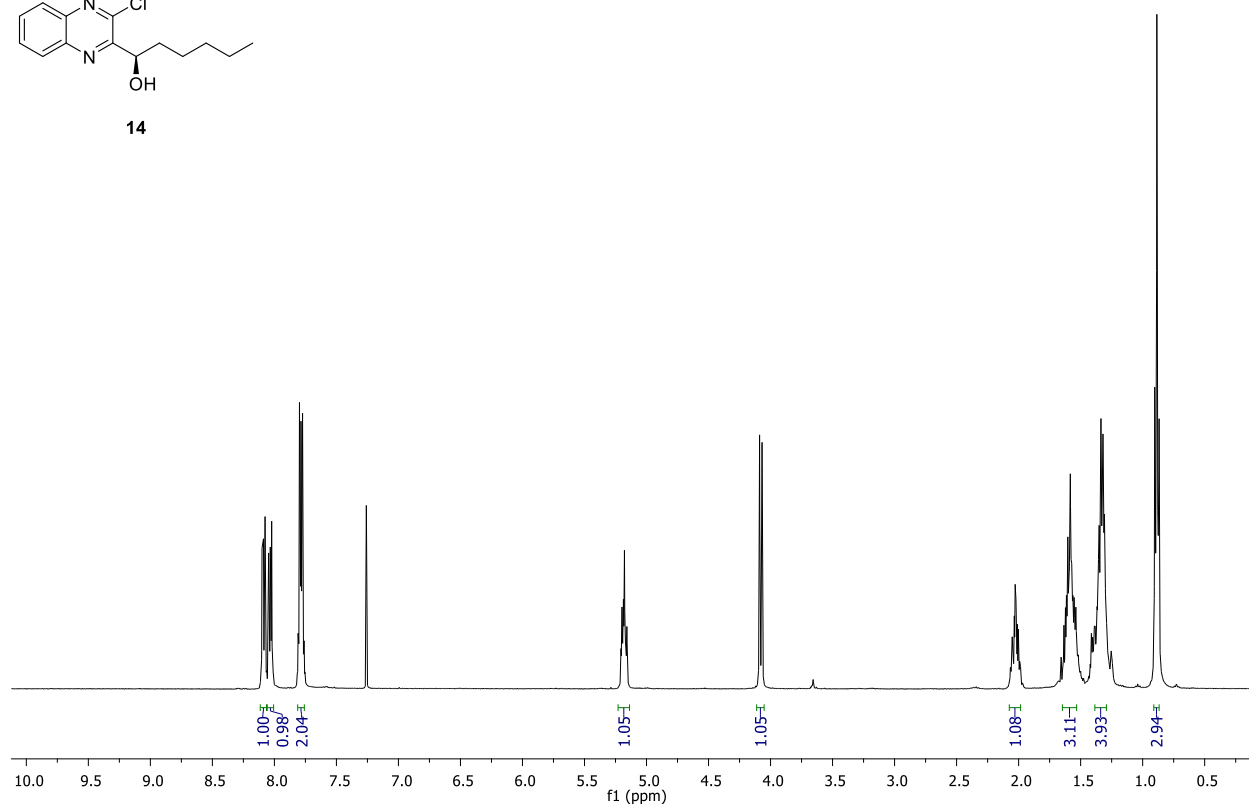

$^{13}\text{C}$  NMR (101 MHz,  $\text{CDCl}_3$ )

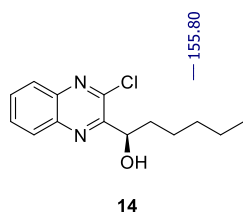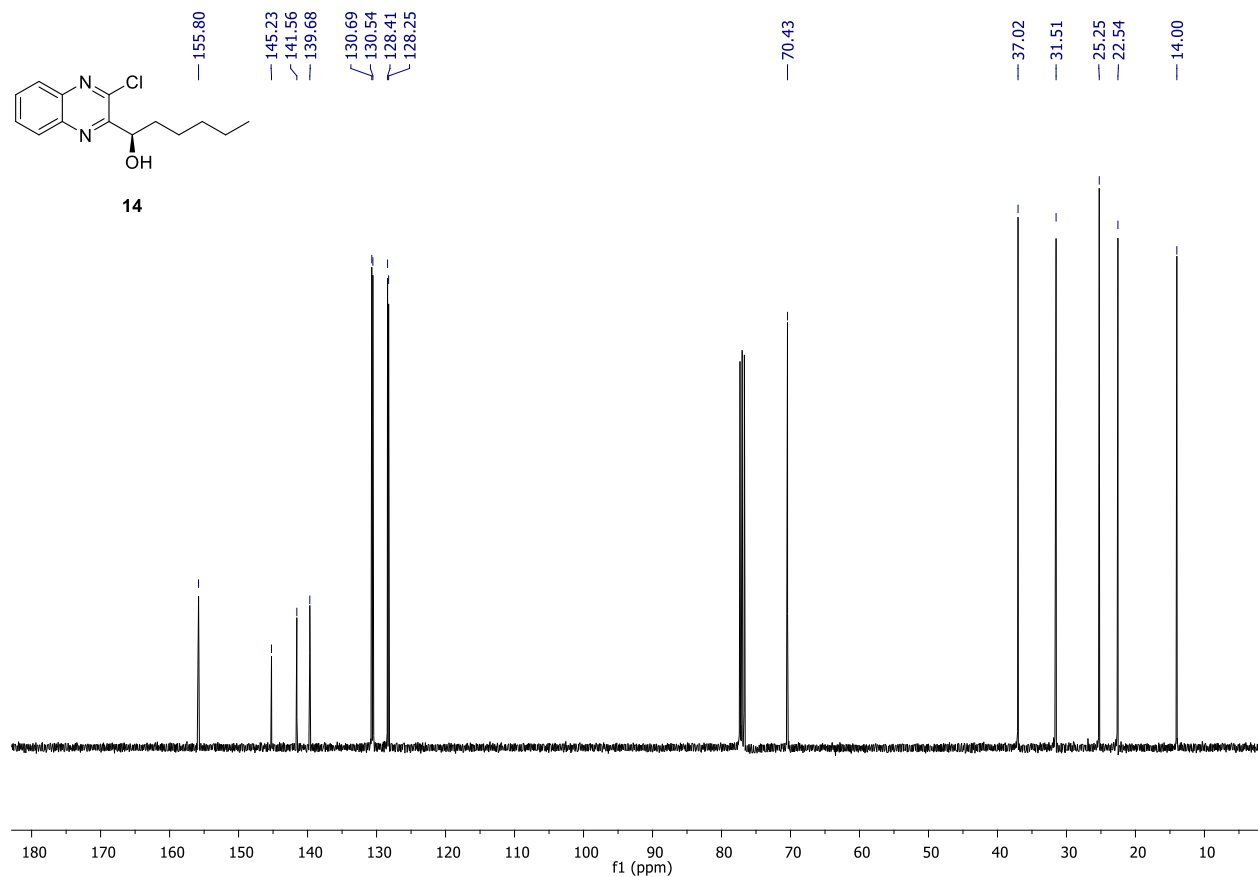

<sup>1</sup>H NMR (400 MHz, CDCl<sub>3</sub>)

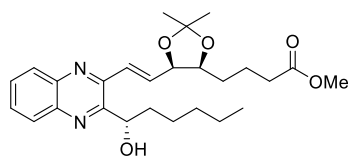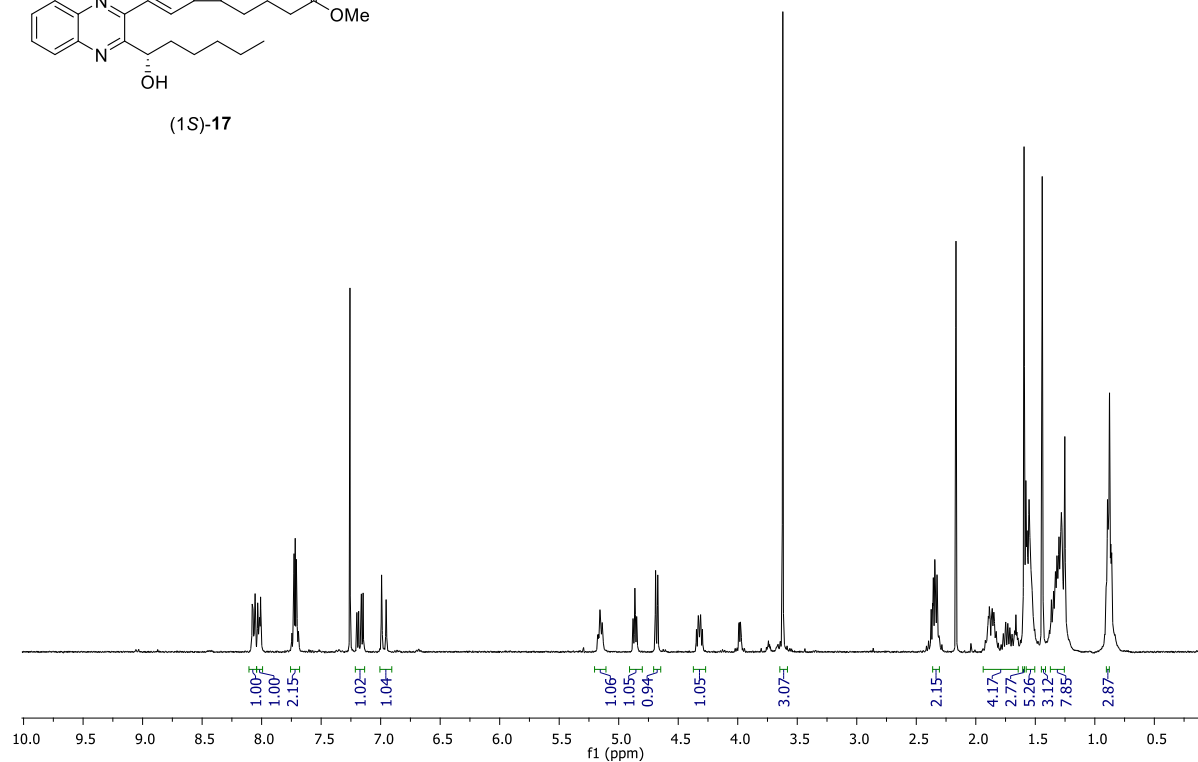

<sup>13</sup>C NMR (101 MHz, CDCl<sub>3</sub>)

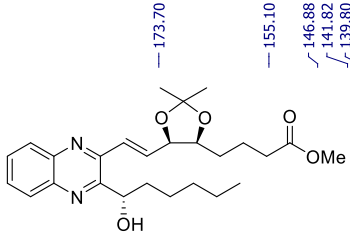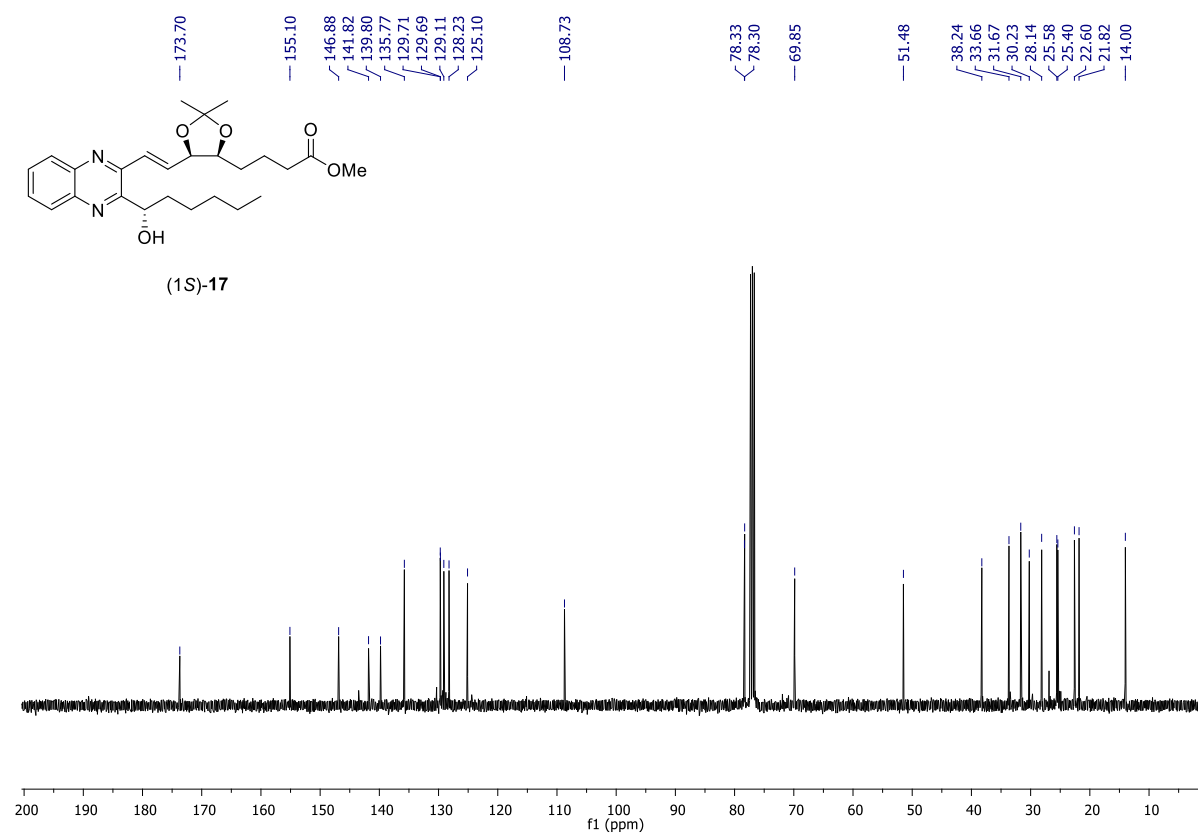

<sup>1</sup>H NMR (400 MHz,  
CDCl<sub>3</sub>)

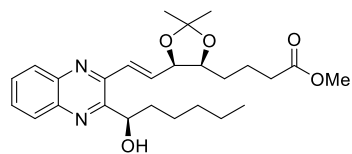

(1*R*)-17

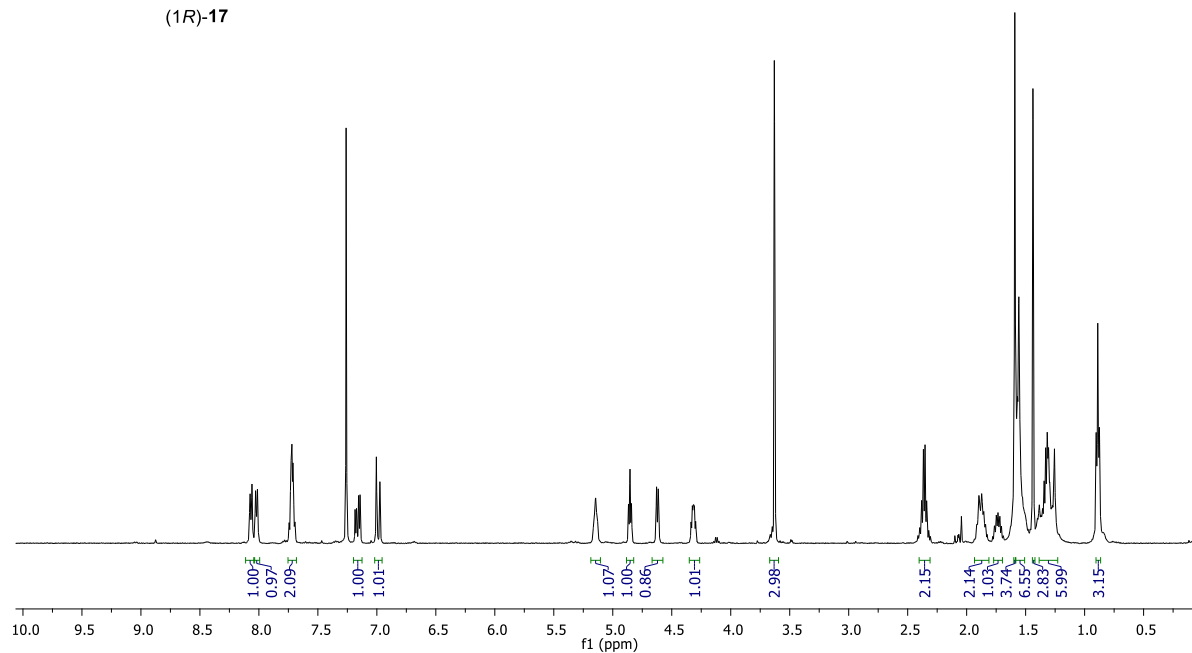

<sup>13</sup>C NMR (101 MHz,  
CDCl<sub>3</sub>)

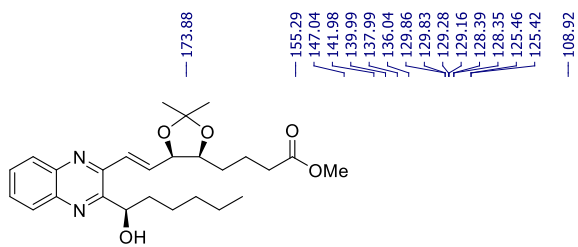

(1*R*)-17

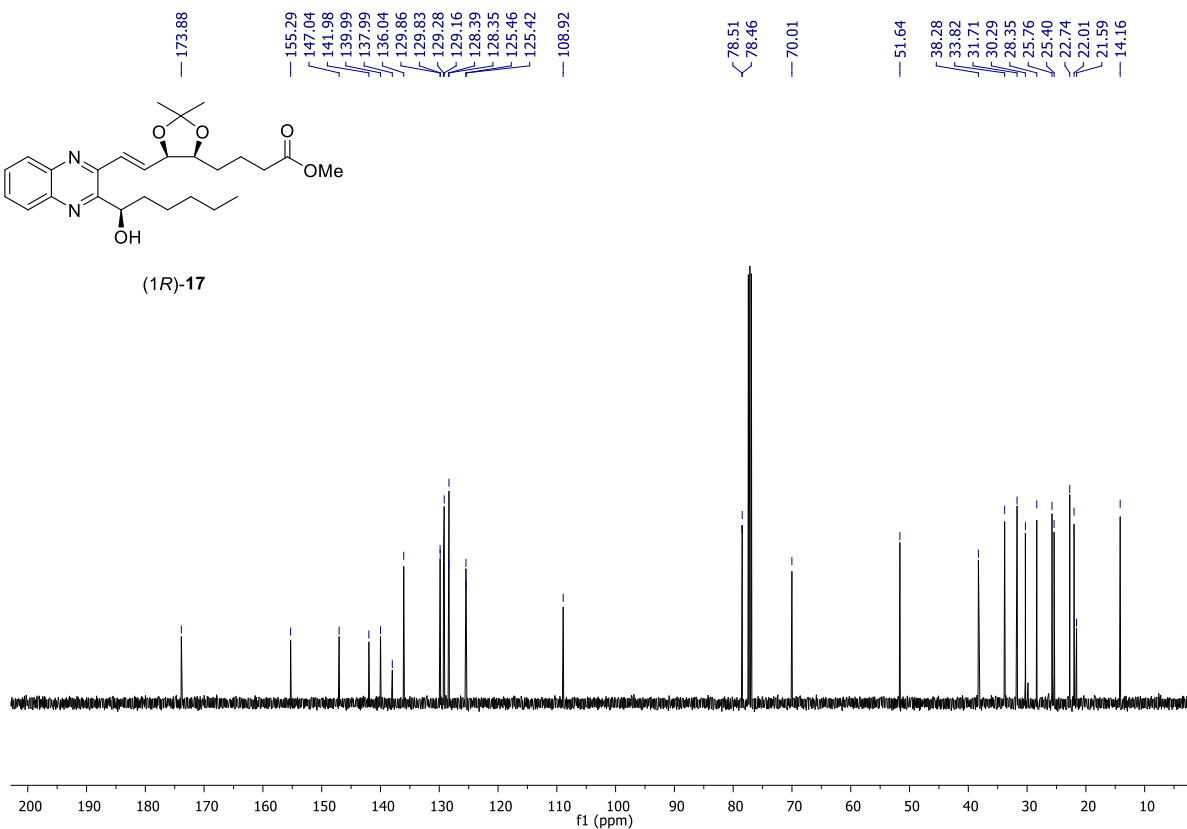

$^1\text{H}$  NMR (400 MHz,  
 $\text{CDCl}_3$ )

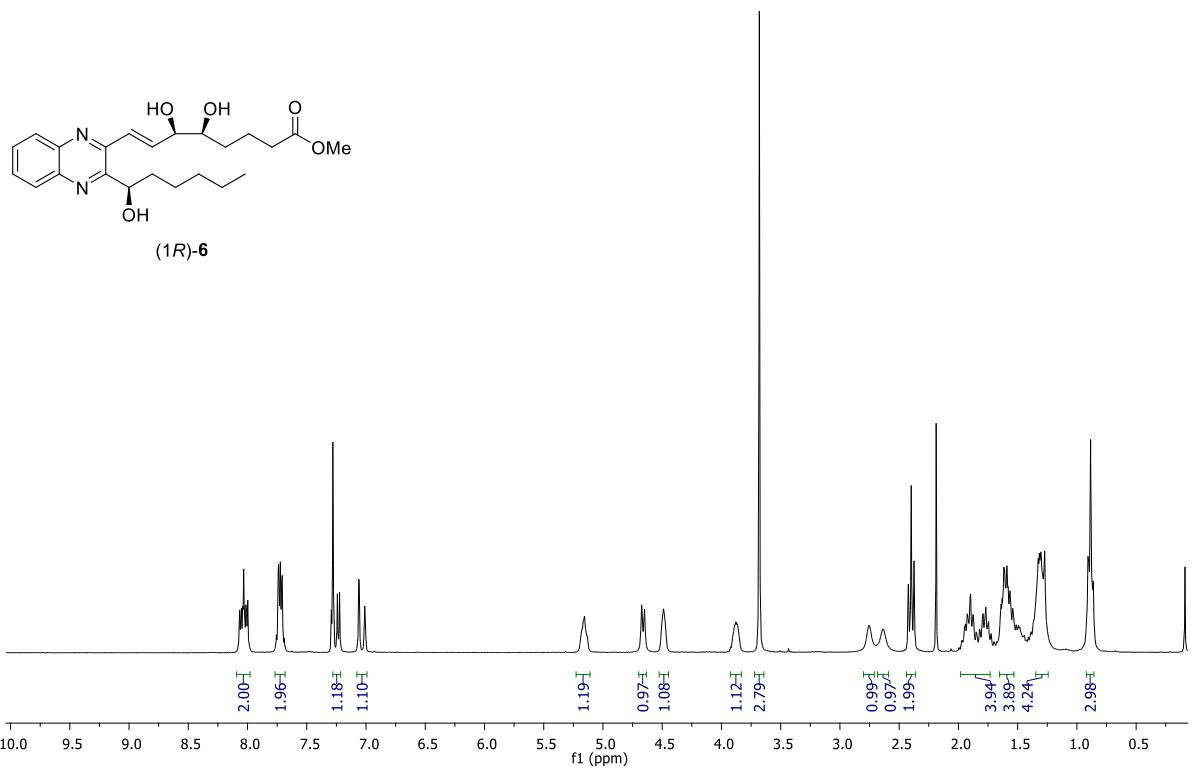

$^{13}\text{C}$  NMR (101 MHz,  
 $\text{CDCl}_3$ )

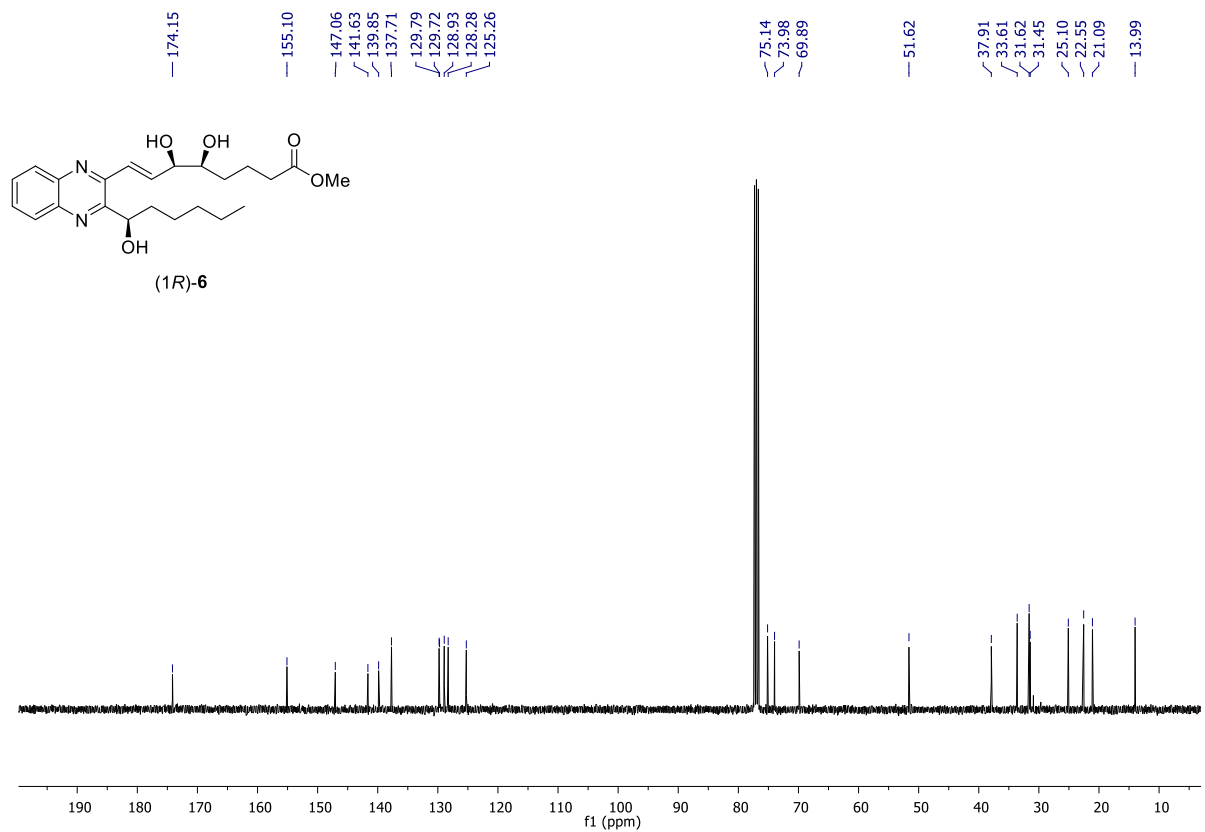

<sup>1</sup>H NMR (500 MHz, CDCl<sub>3</sub>)

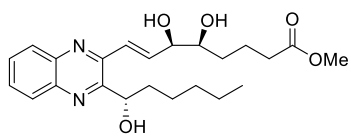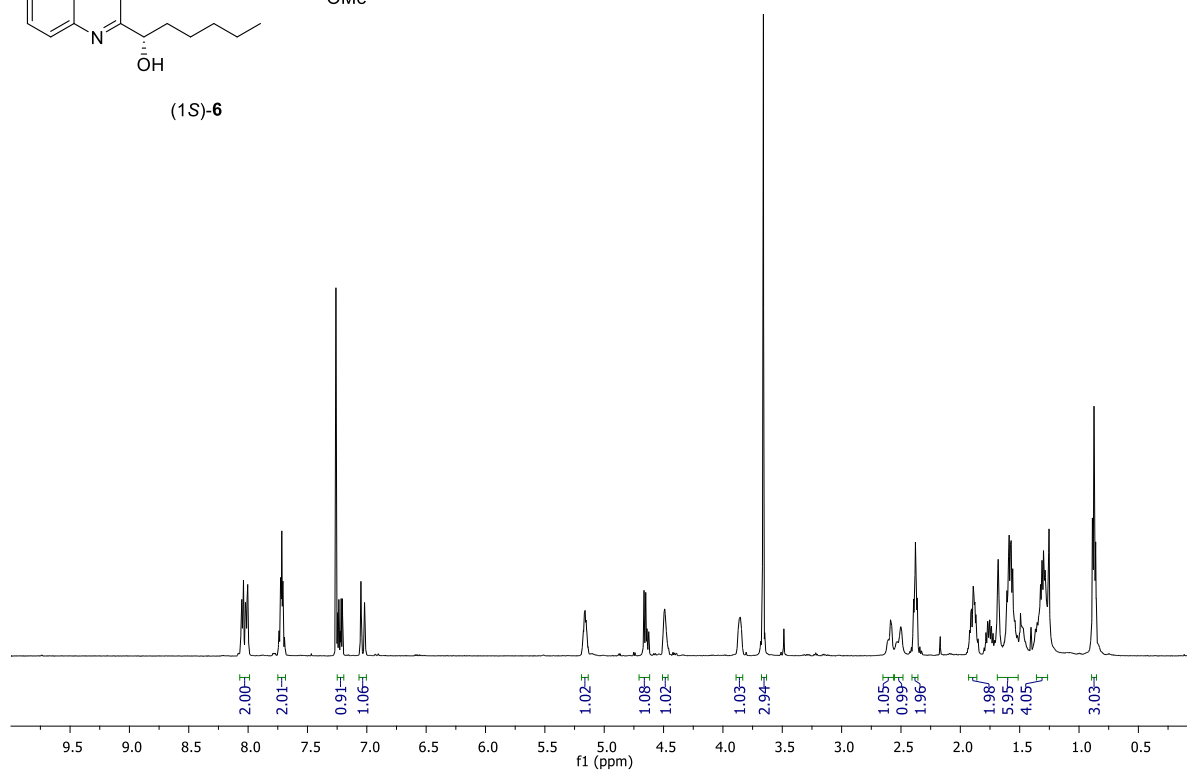

<sup>13</sup>C NMR (126 MHz, CDCl<sub>3</sub>)

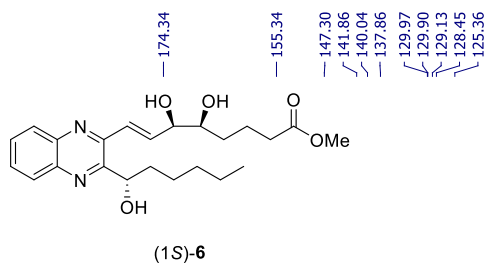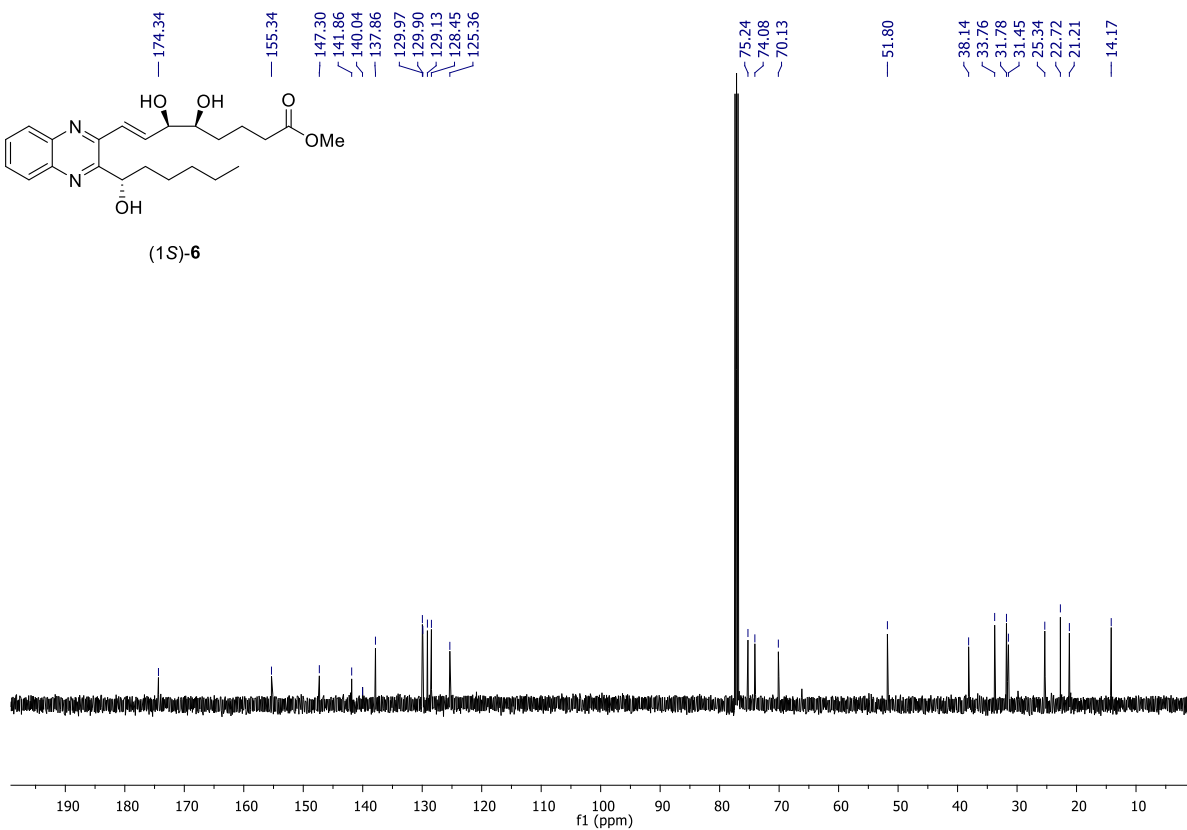



<sup>1</sup>H NMR (400 MHz, CDCl<sub>3</sub>)

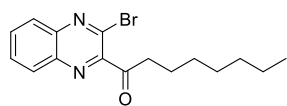

28

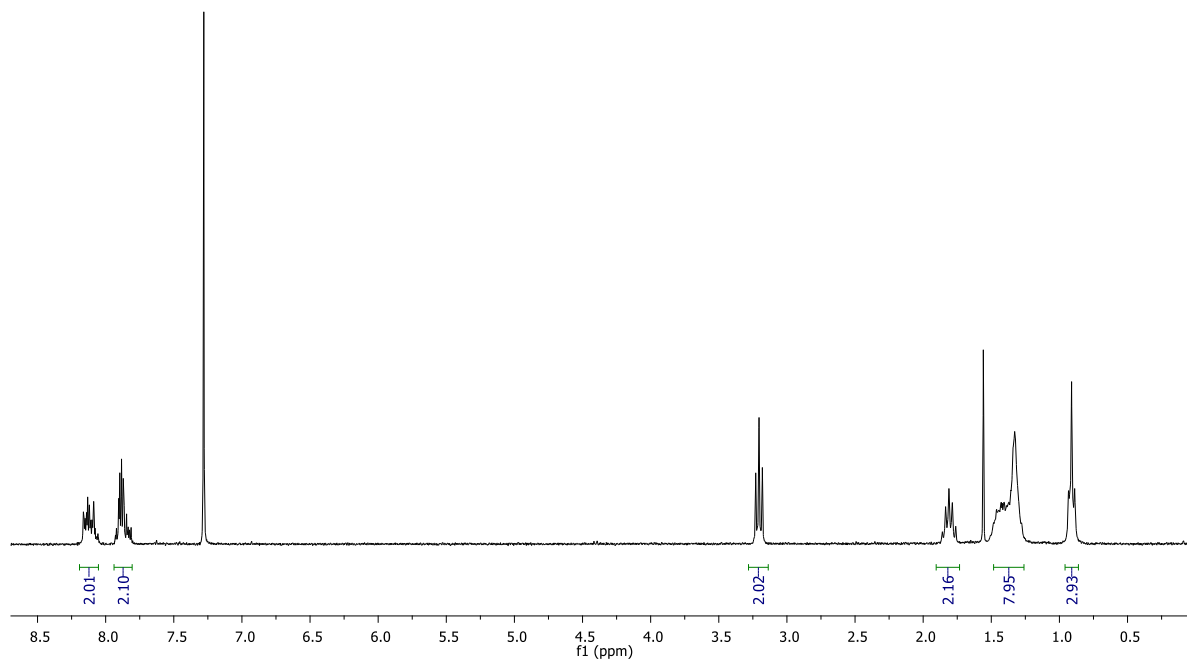

<sup>13</sup>C NMR (101 MHz, CDCl<sub>3</sub>)

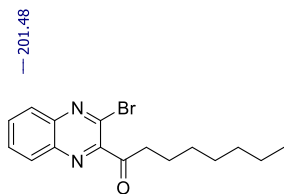

28

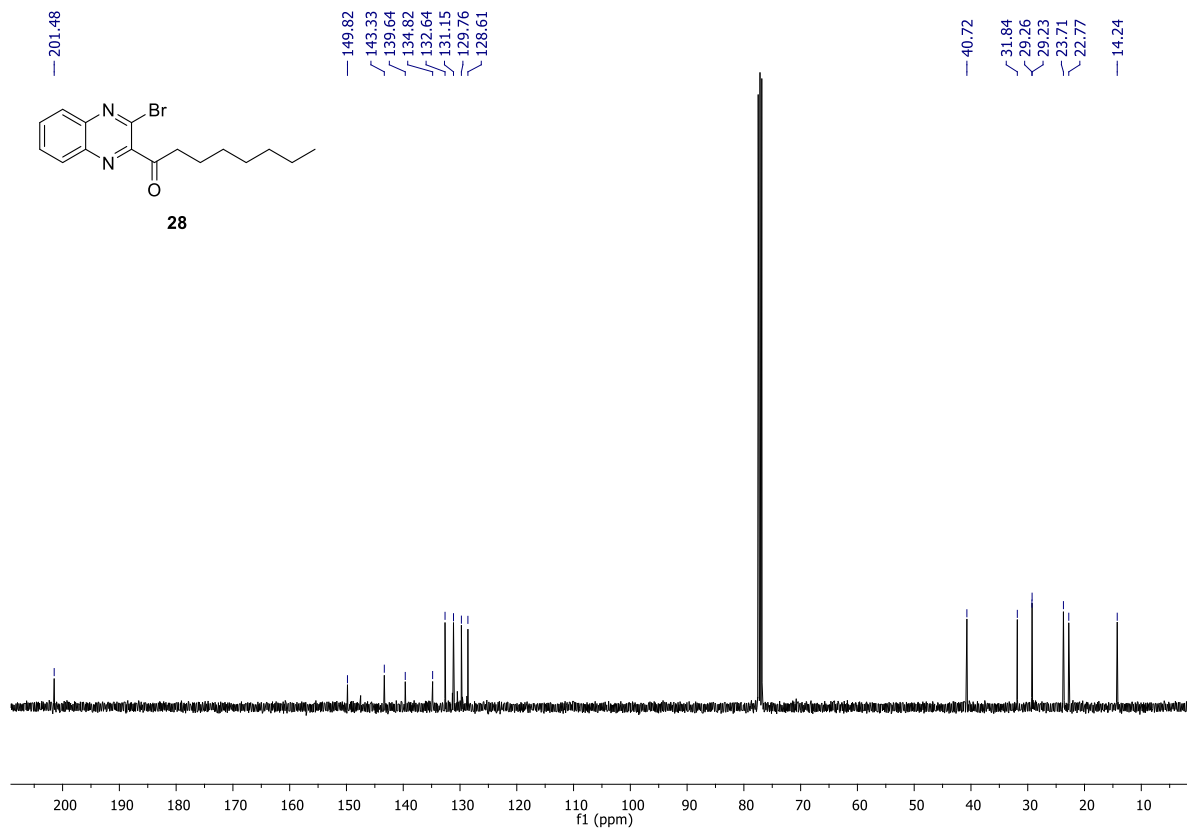

$^1\text{H}$  NMR (101 MHz,  $\text{CDCl}_3$ )

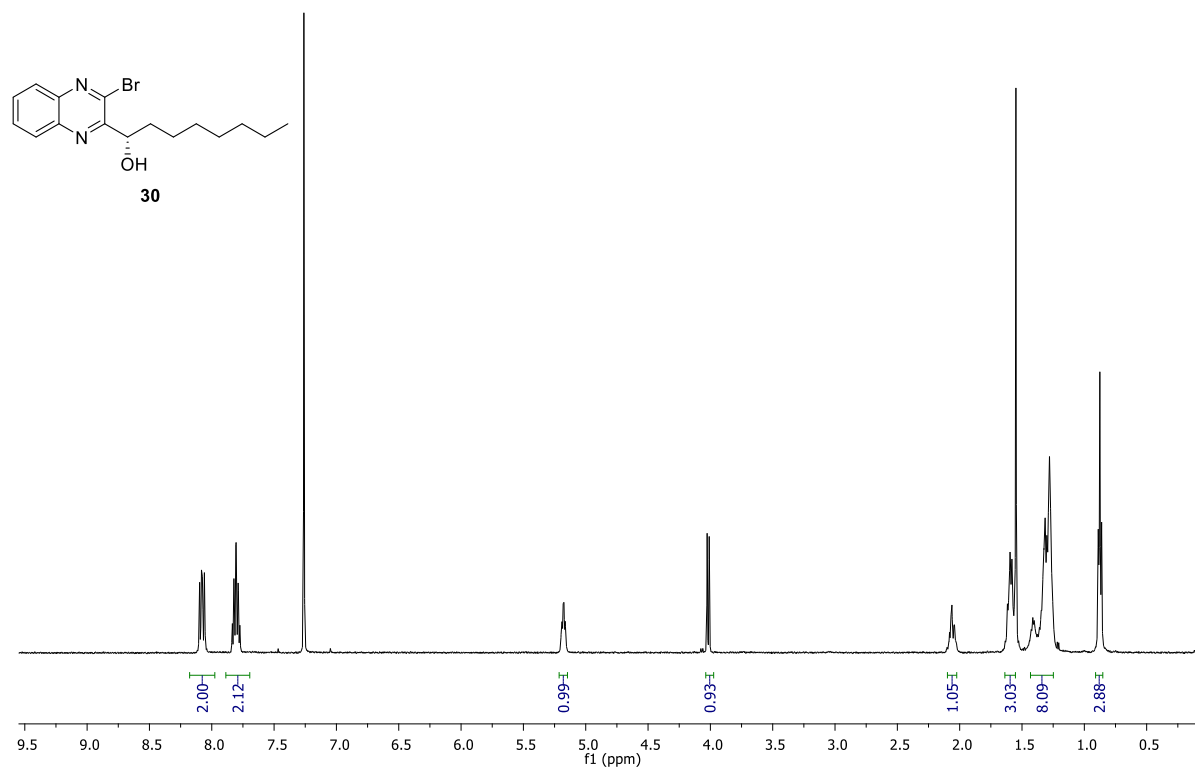

$^{13}\text{C}$  NMR (101 MHz,  $\text{CDCl}_3$ )

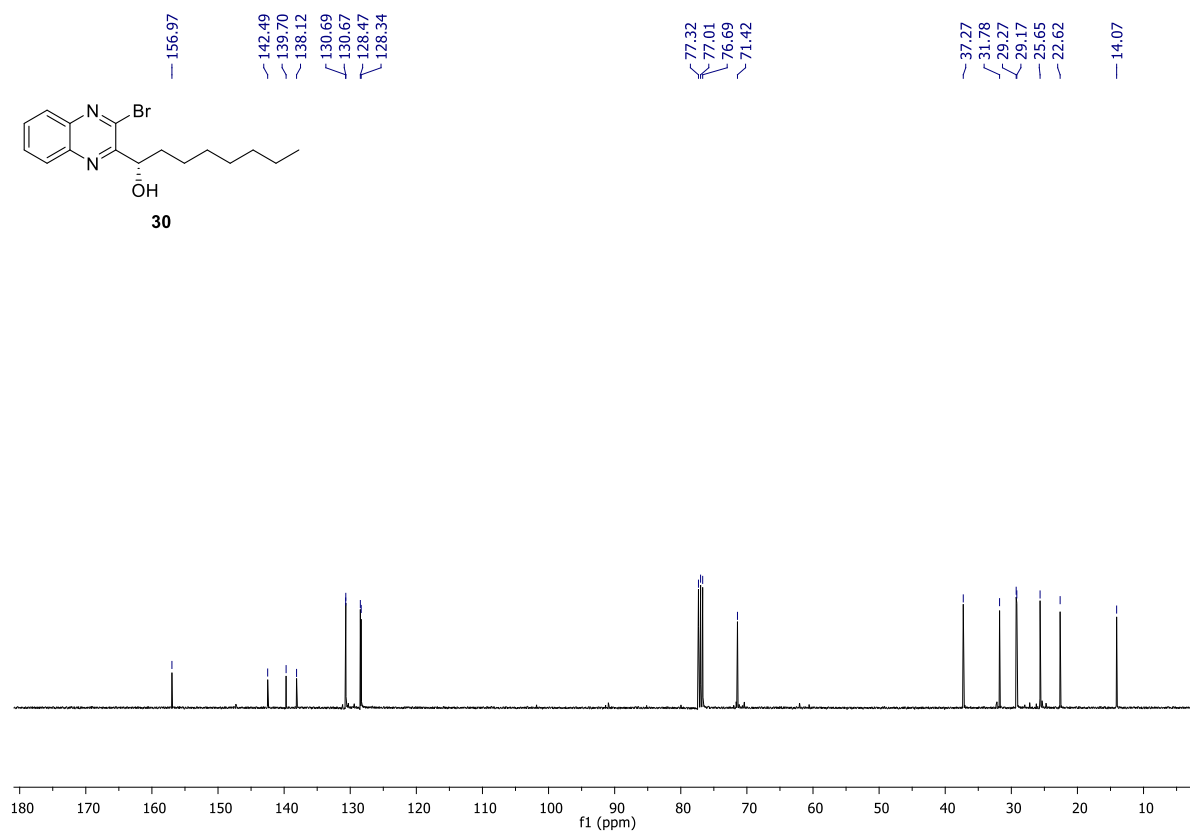

$^1\text{H}$  NMR (400 MHz,  $\text{CDCl}_3$ )

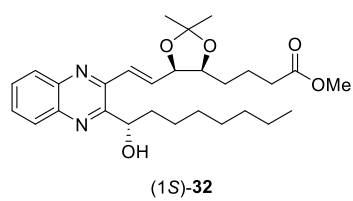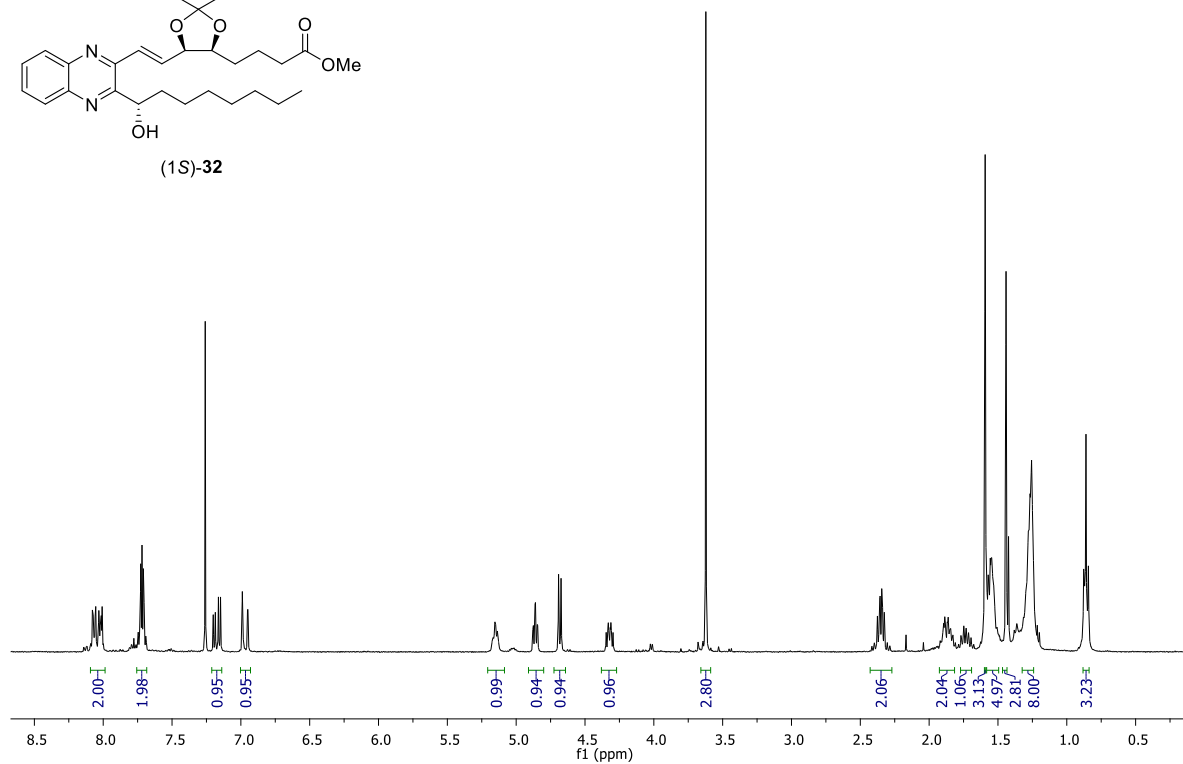

$^{13}\text{C}$  NMR (101 MHz,  $\text{CDCl}_3$ )

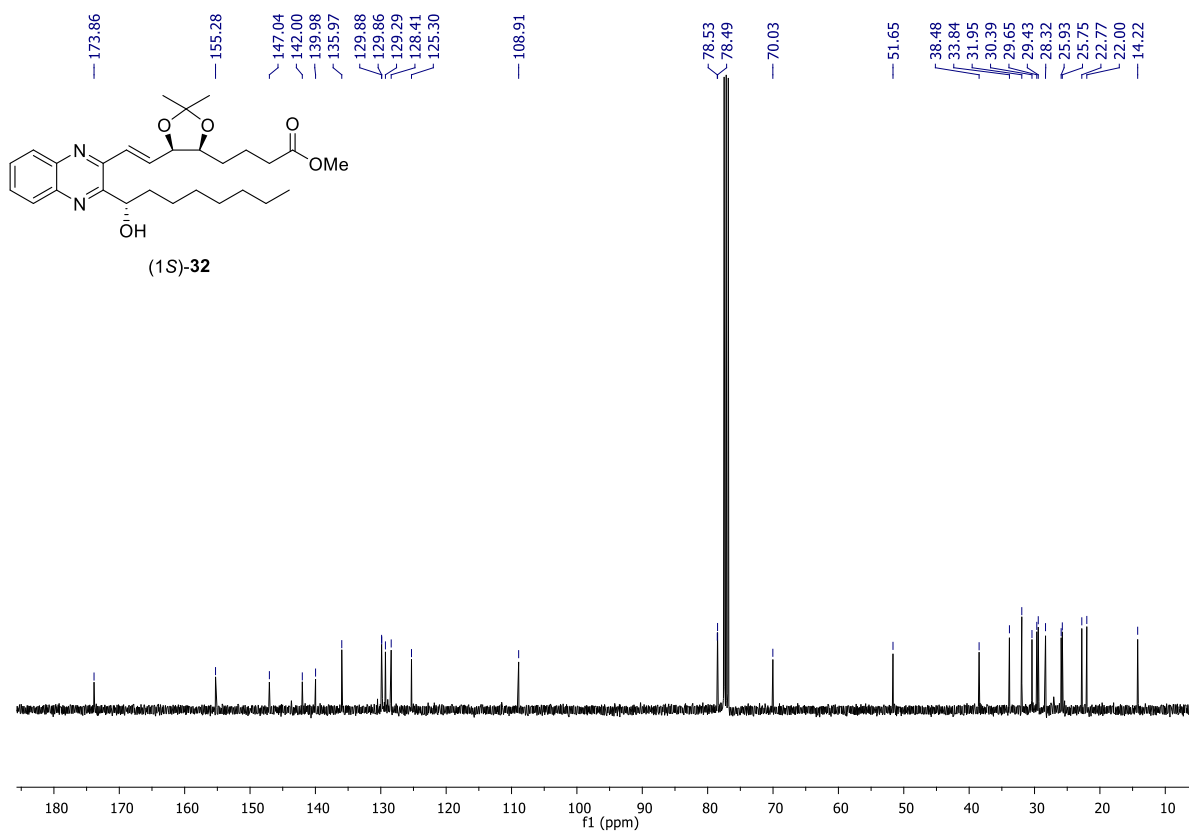

<sup>1</sup>H NMR (400 MHz, CDCl<sub>3</sub>)

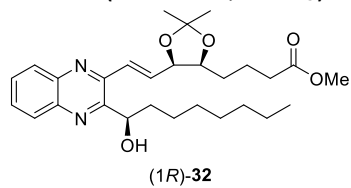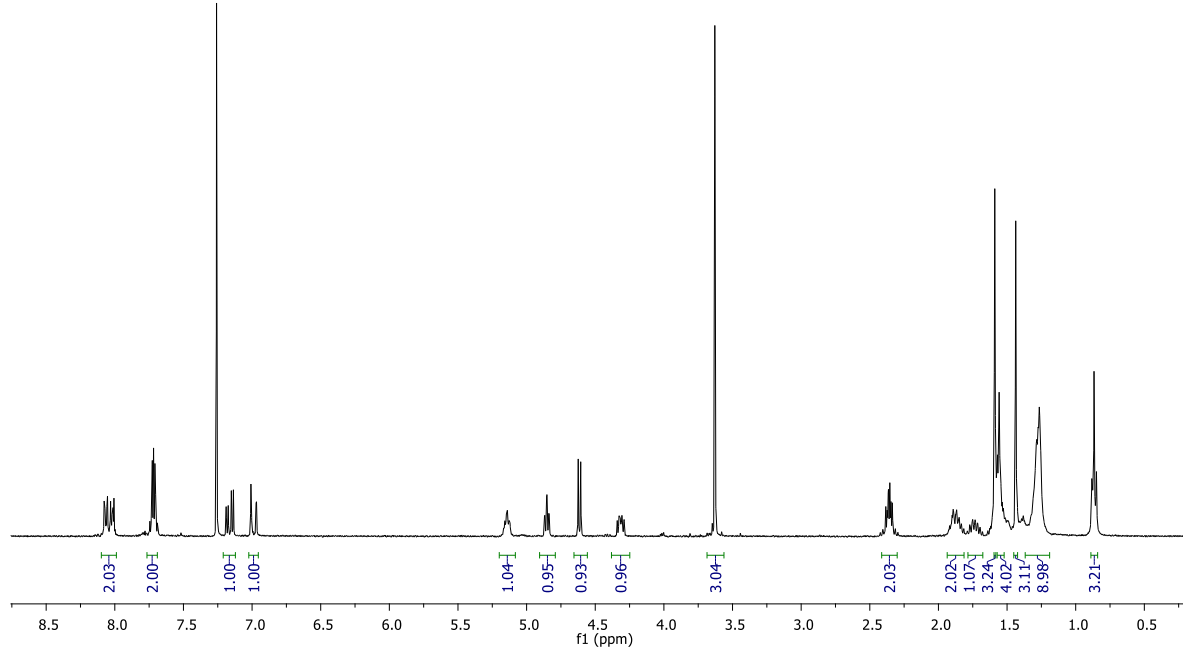

<sup>13</sup>C NMR (101 MHz, CDCl<sub>3</sub>)

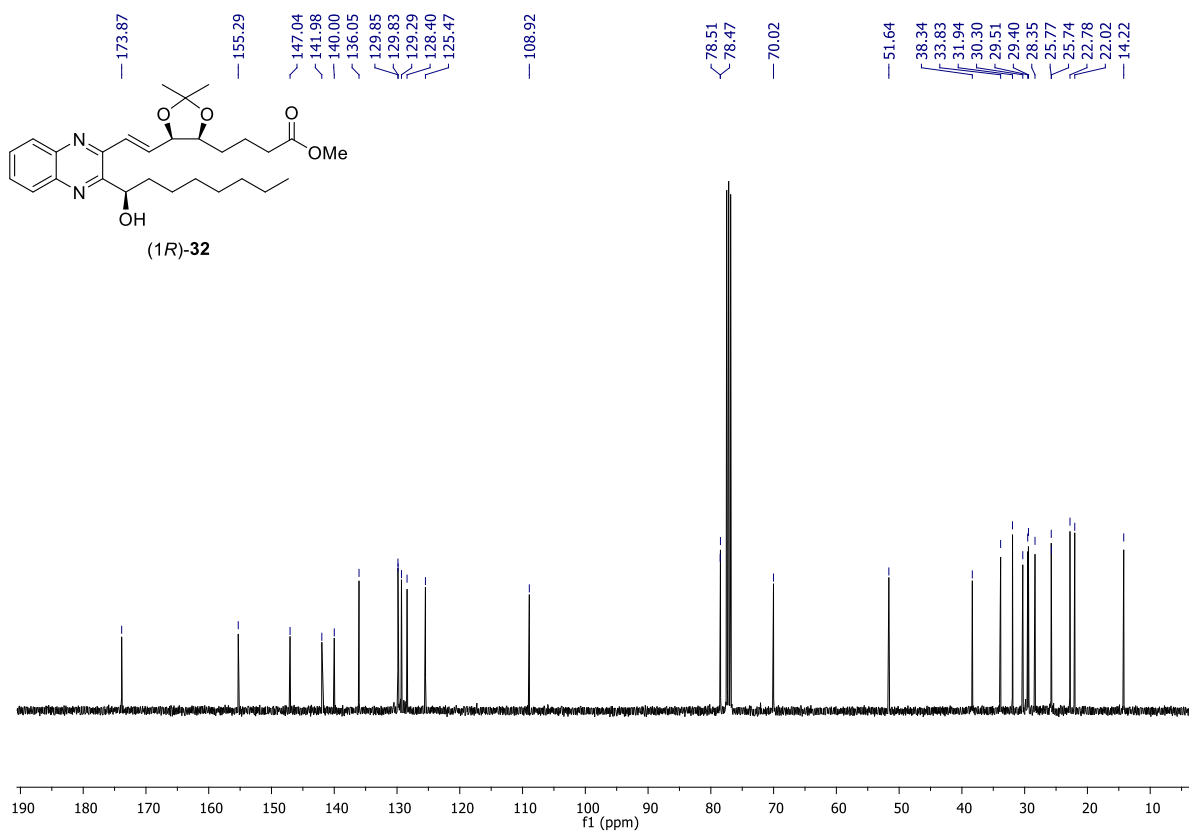

<sup>1</sup>H NMR (400 MHz, CDCl<sub>3</sub>)

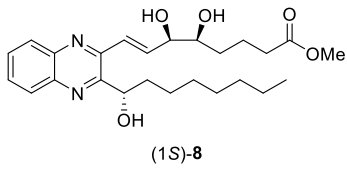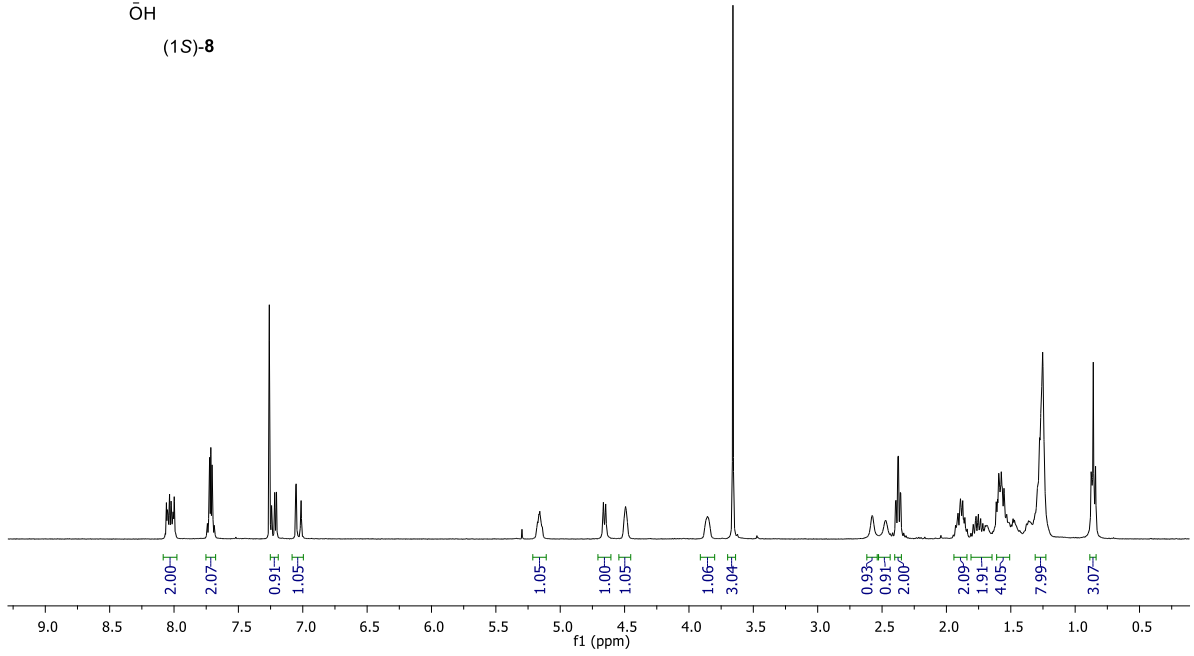

<sup>13</sup>C NMR (101 MHz, CDCl<sub>3</sub>)

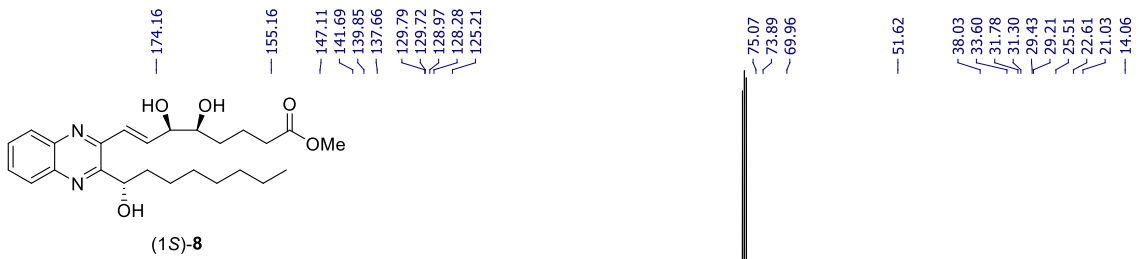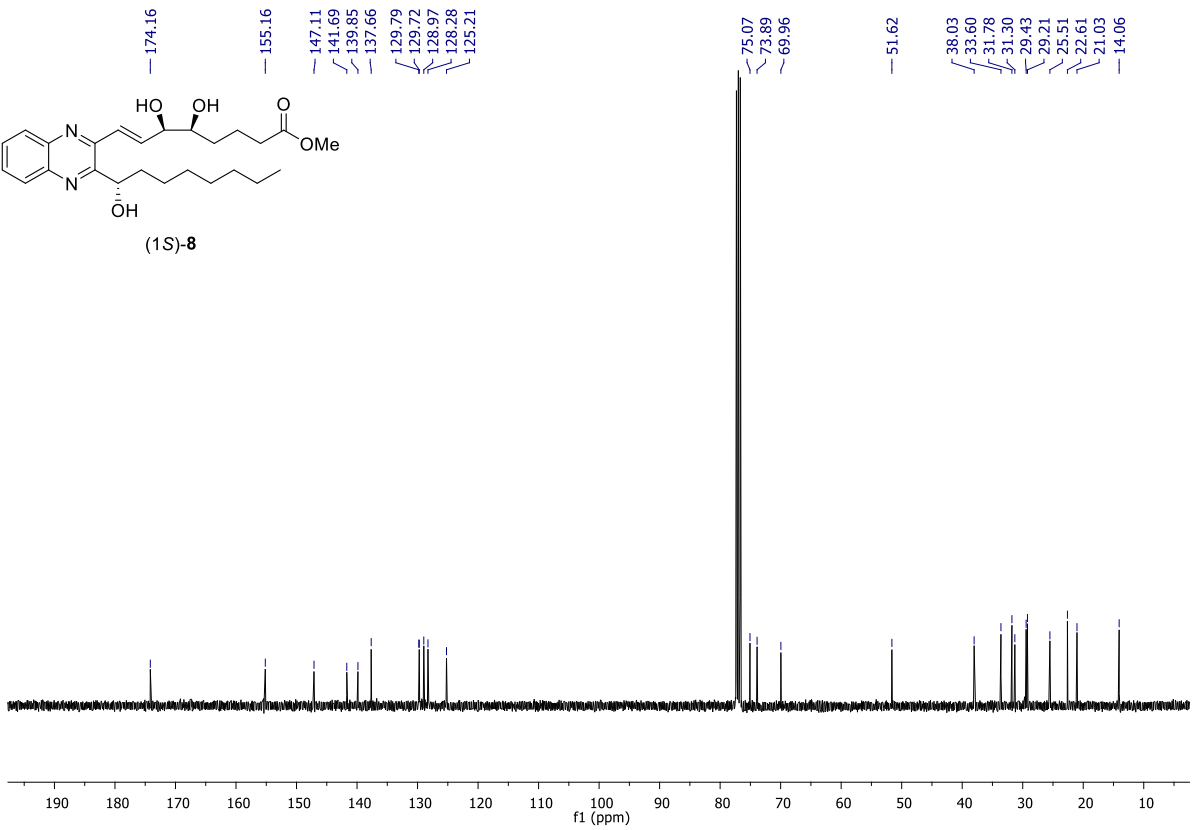

$^1\text{H}$  NMR (400 MHz,  $\text{CDCl}_3$ )

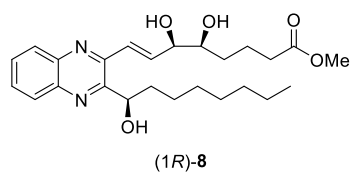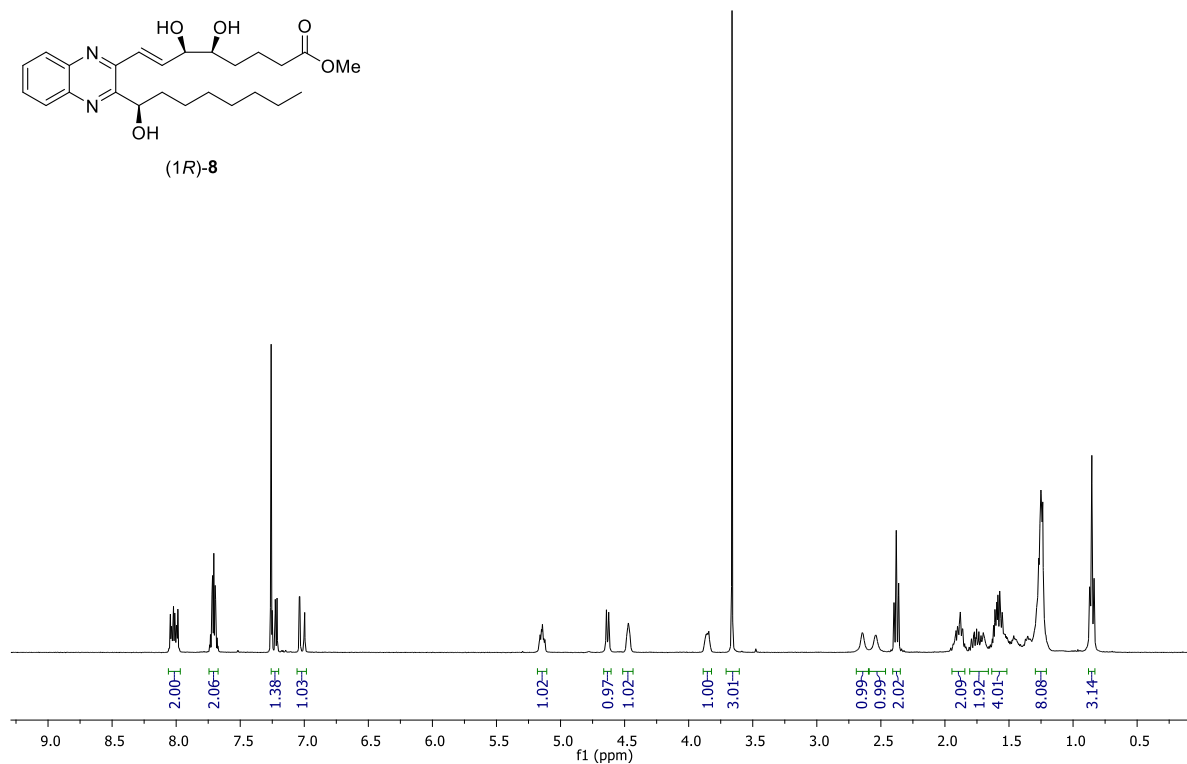

$^{13}\text{C}$  NMR (101 MHz,  $\text{CDCl}_3$ )

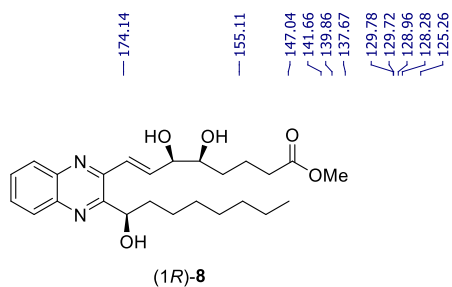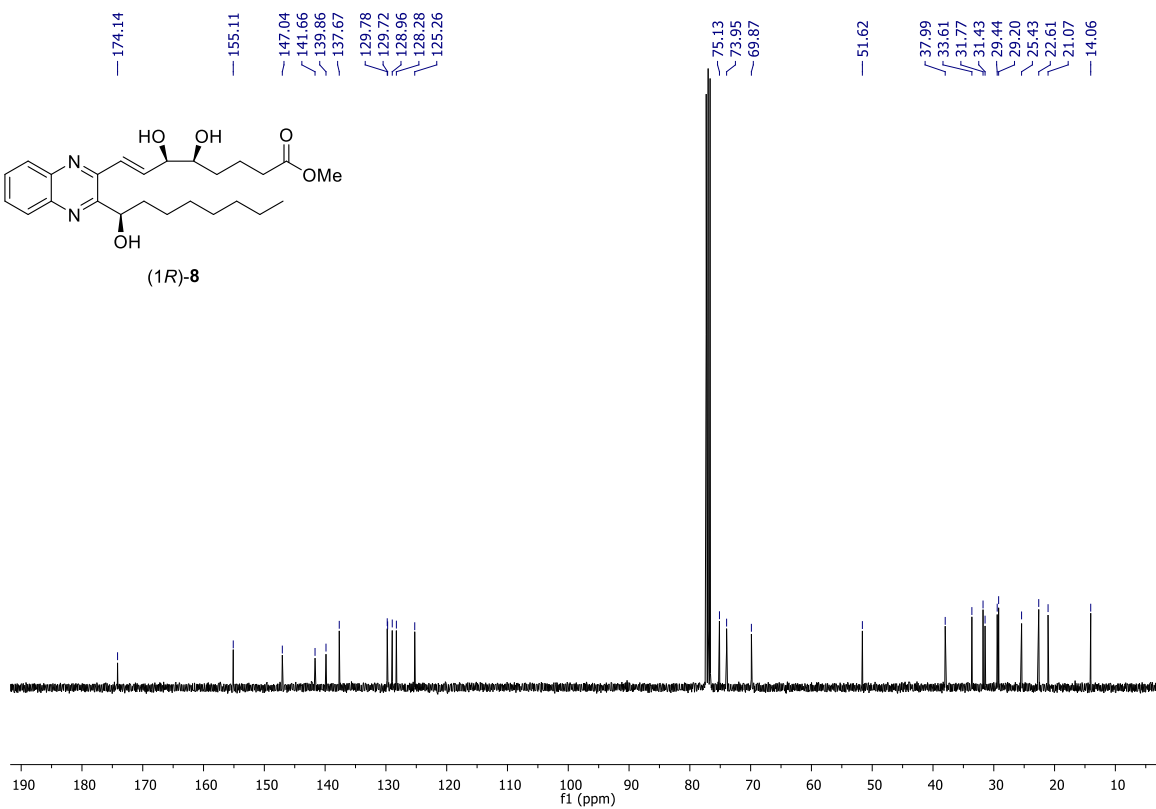

$^1\text{H}$  NMR (400 MHz,  
 $\text{CDCl}_3$ )

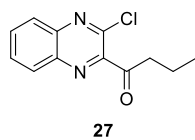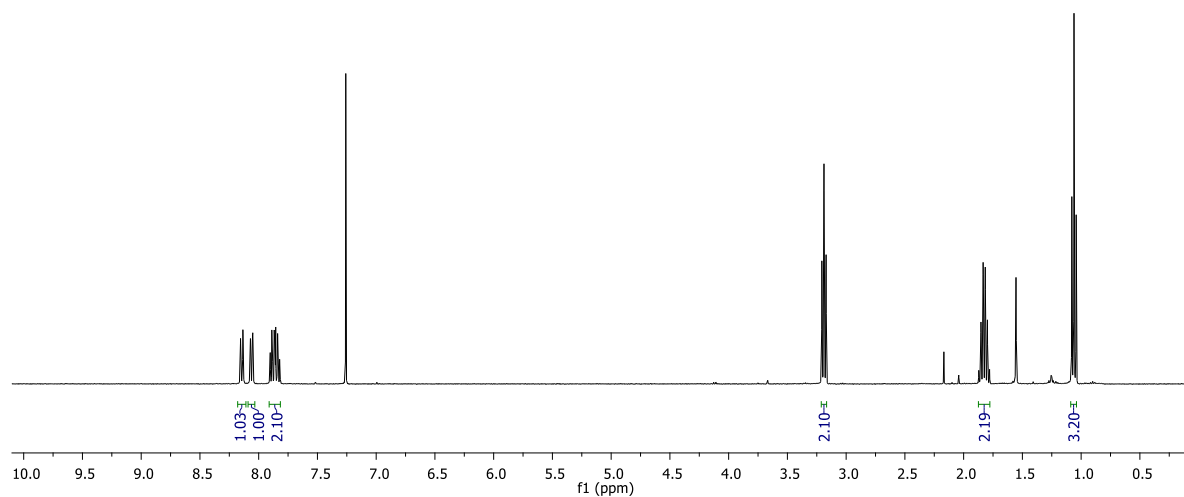

$^{13}\text{C}$  NMR (101 MHz,  
 $\text{CDCl}_3$ )

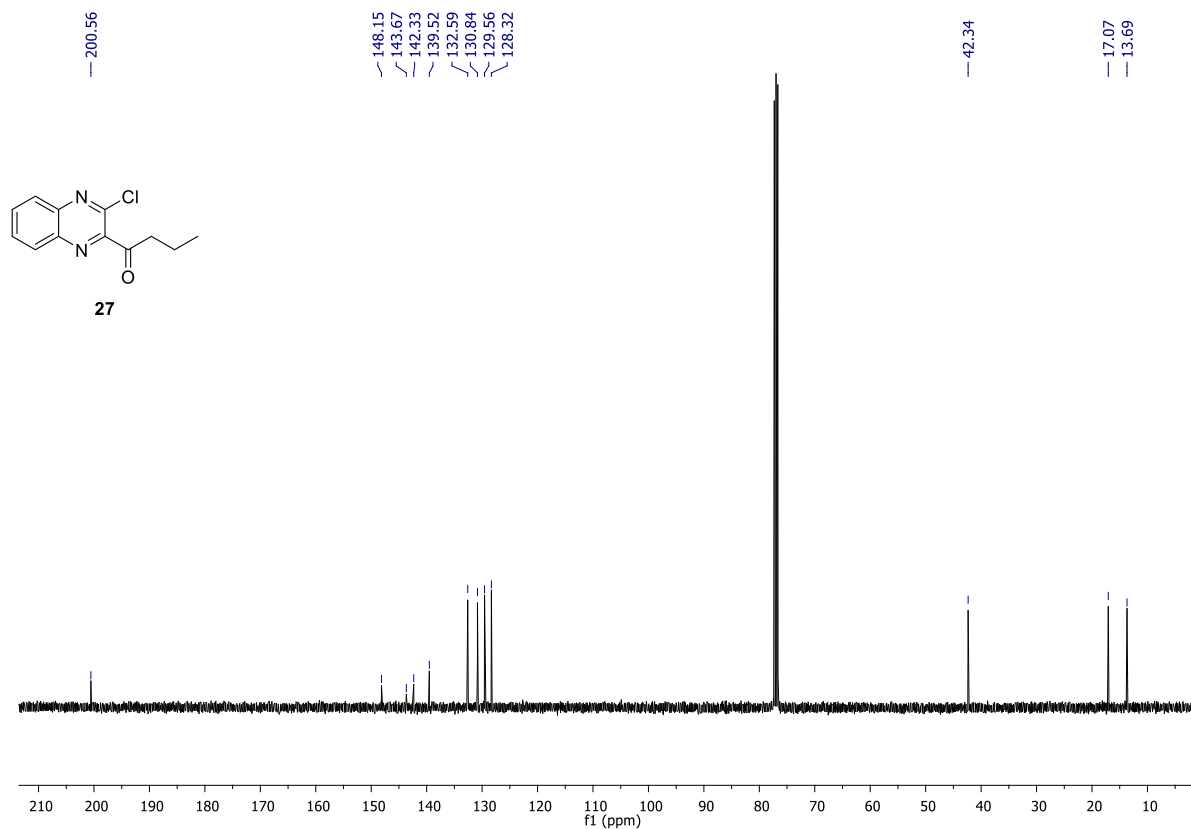

$^1\text{H}$  NMR (400 MHz,  $\text{CDCl}_3$ )

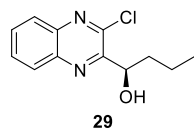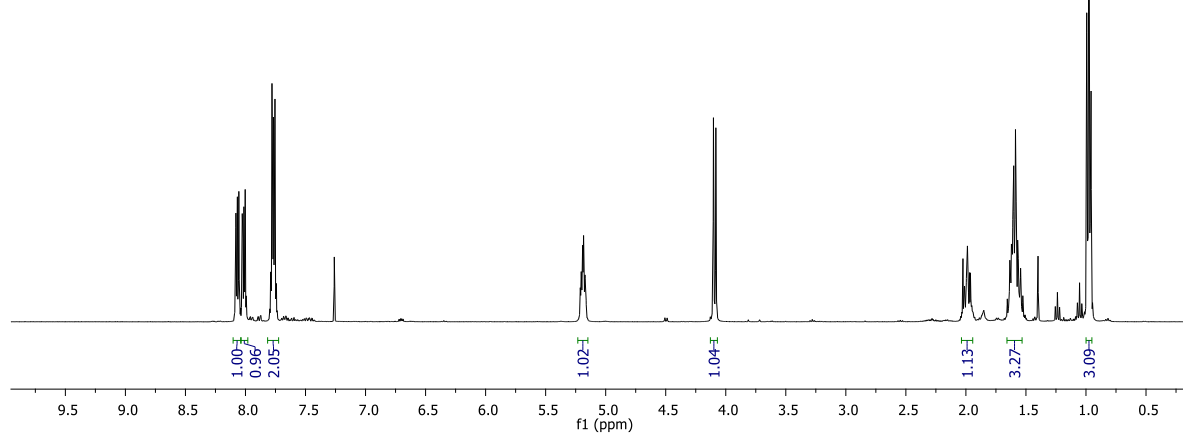

$^{13}\text{C}$  NMR (101 MHz,  $\text{CDCl}_3$ )

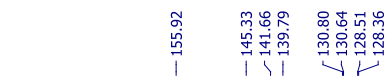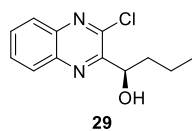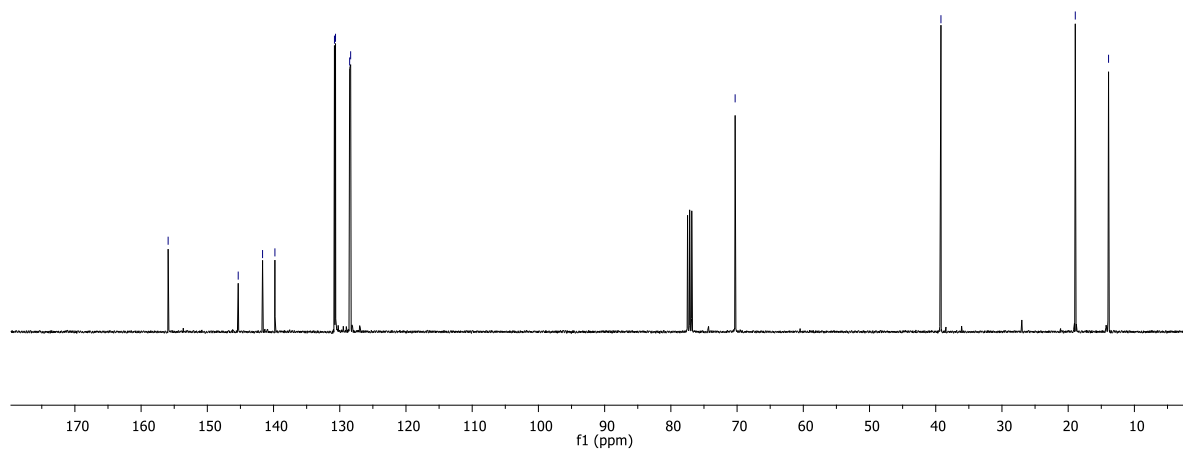



<sup>1</sup>H NMR (400 MHz, CDCl<sub>3</sub>)

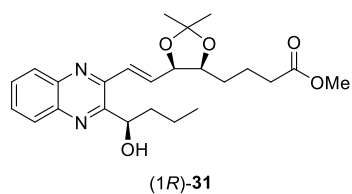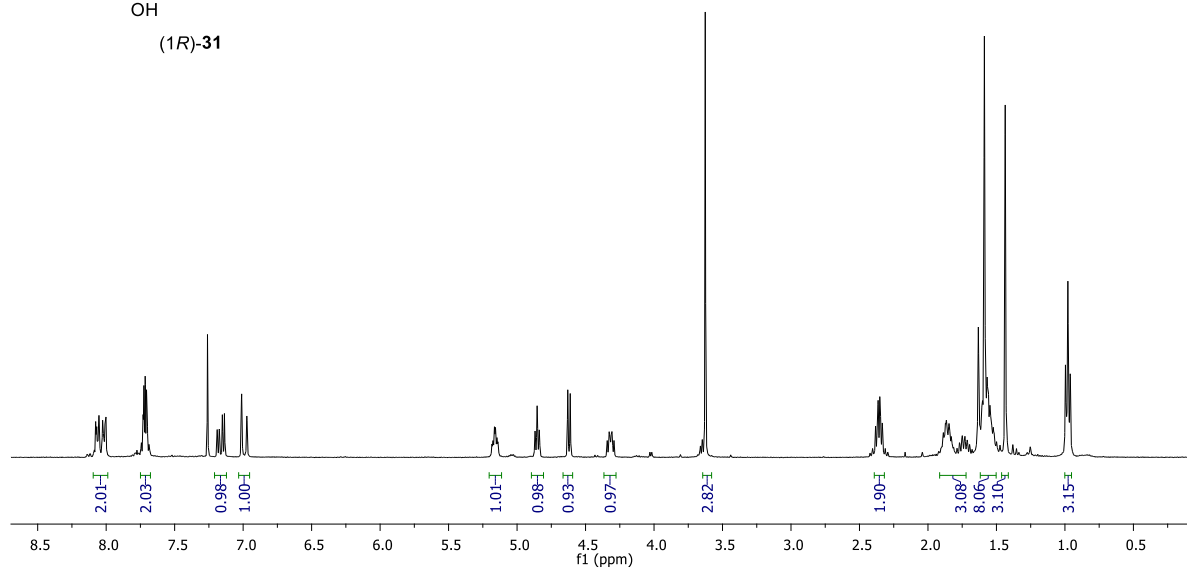

<sup>13</sup>C NMR (101 MHz, CDCl<sub>3</sub>)

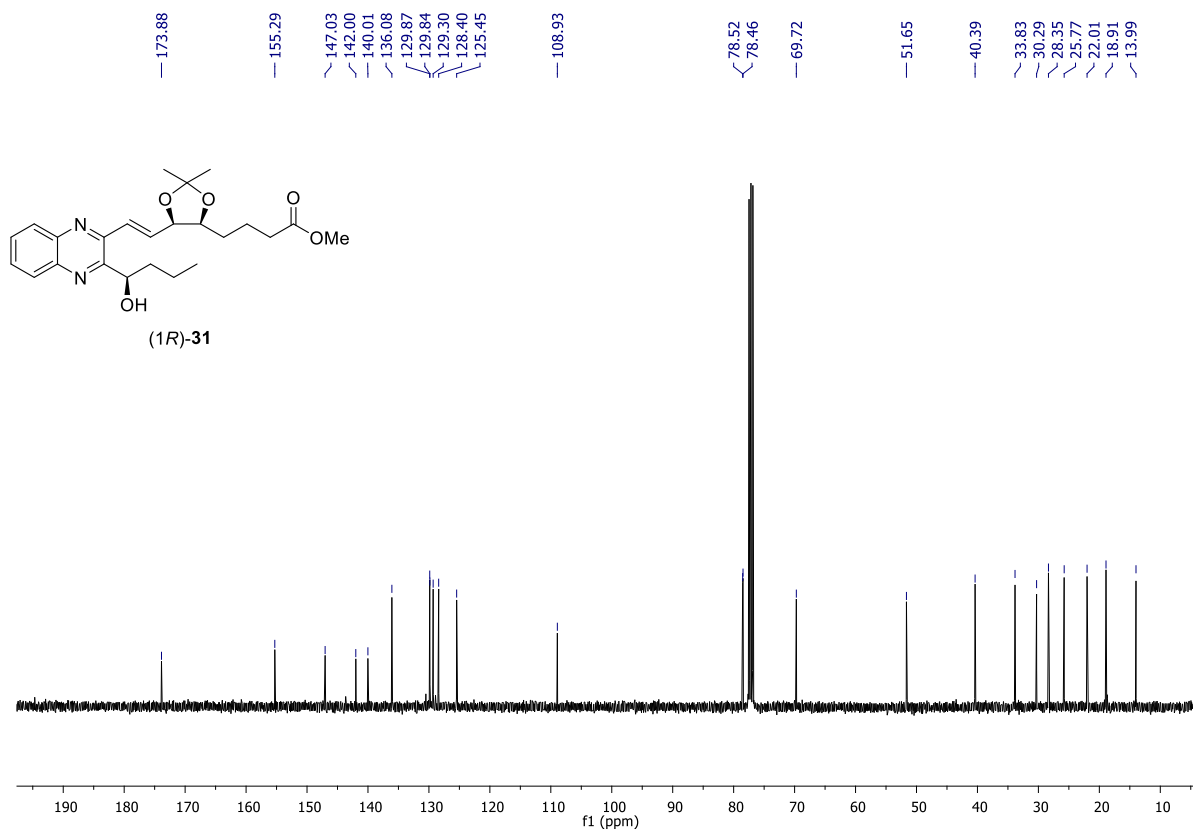

$^1\text{H}$  NMR (400 MHz,  $\text{CDCl}_3$ )

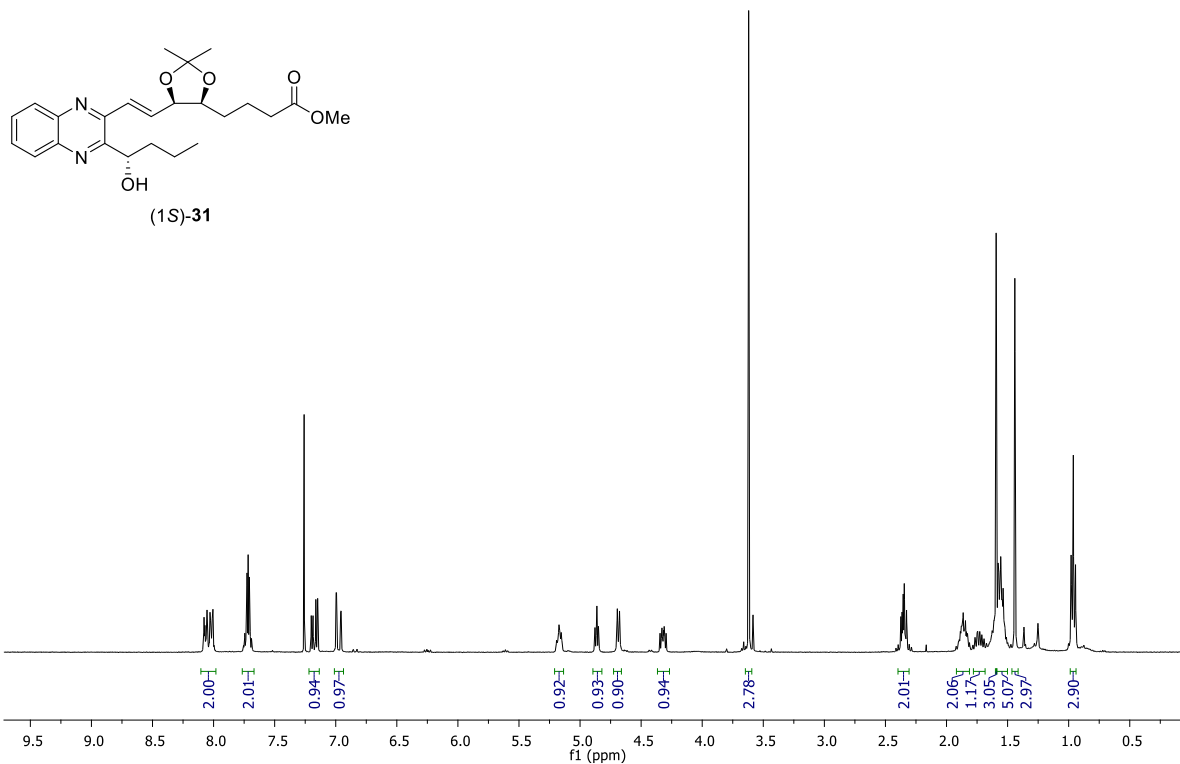

$^{13}\text{C}$  NMR (101 MHz,  $\text{CDCl}_3$ )

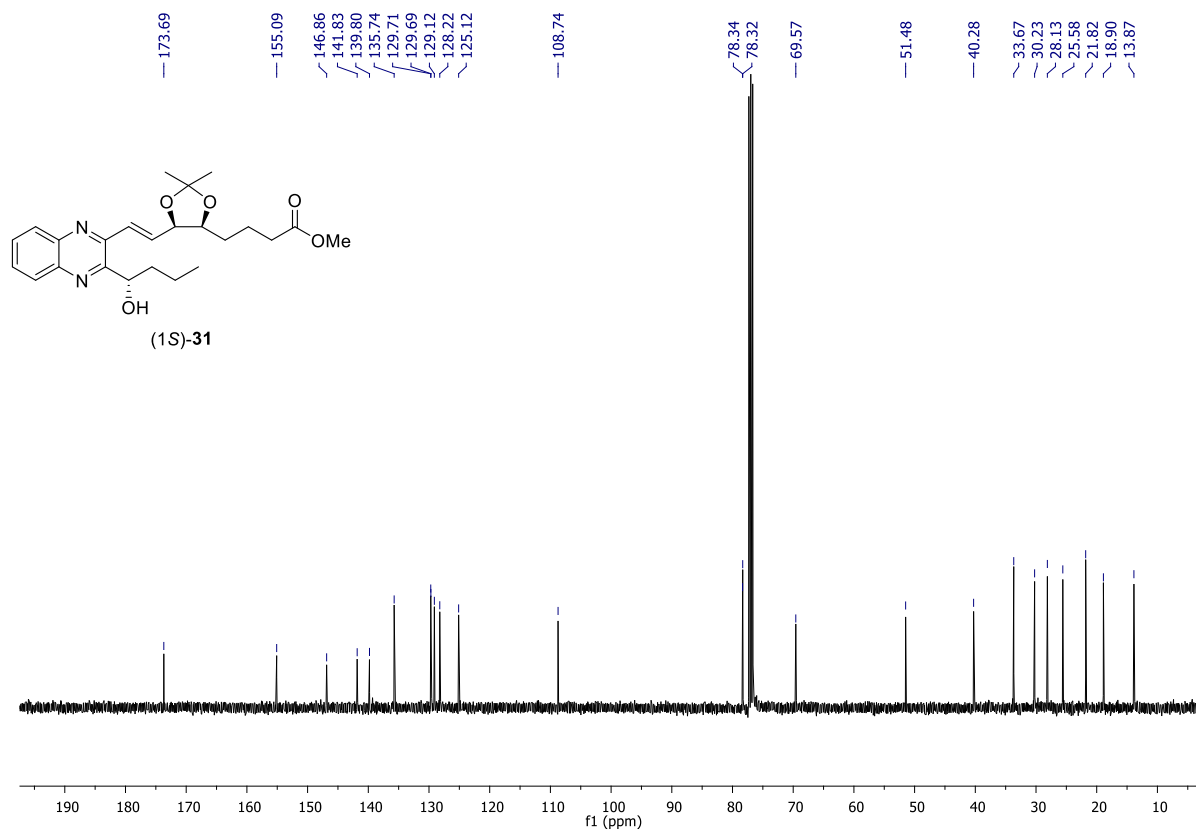

<sup>1</sup>H NMR (400 MHz, CDCl<sub>3</sub>)

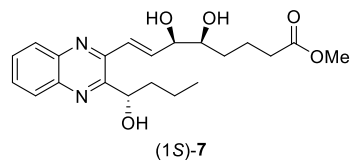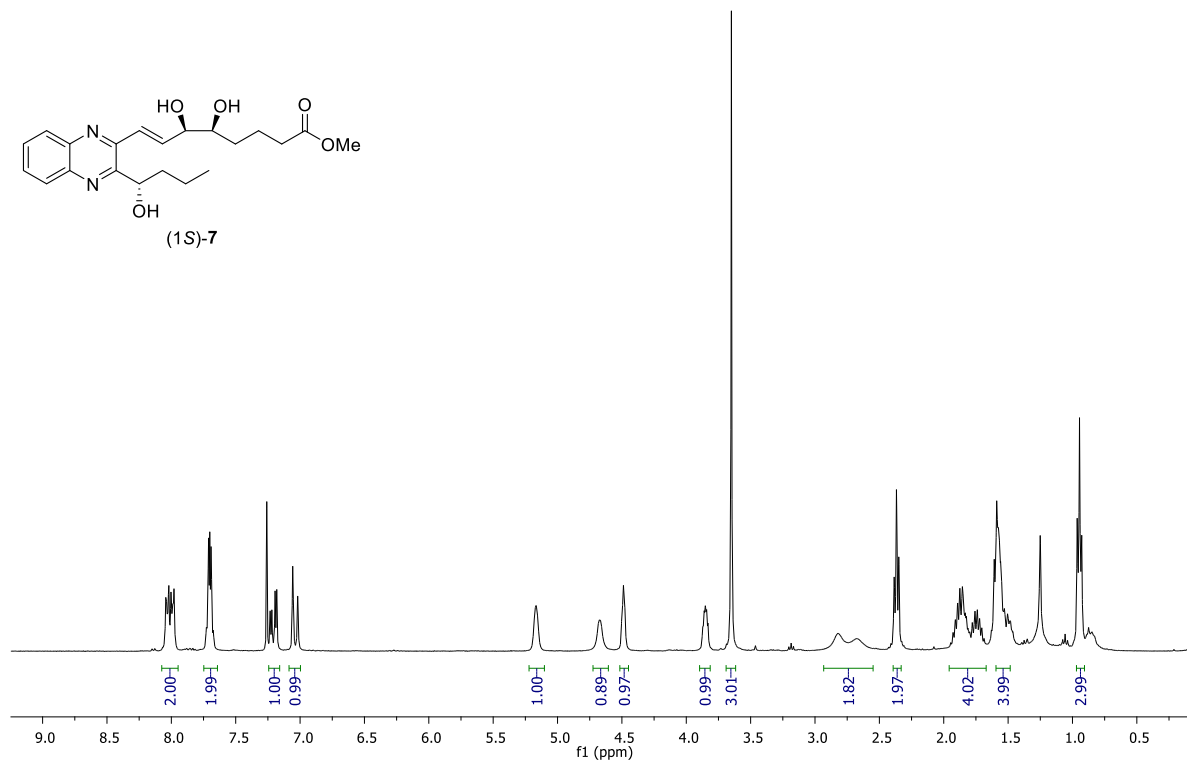

<sup>13</sup>C NMR (101 MHz, CDCl<sub>3</sub>)

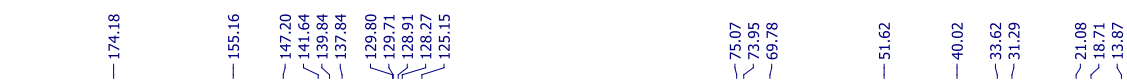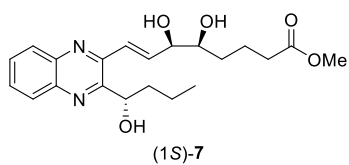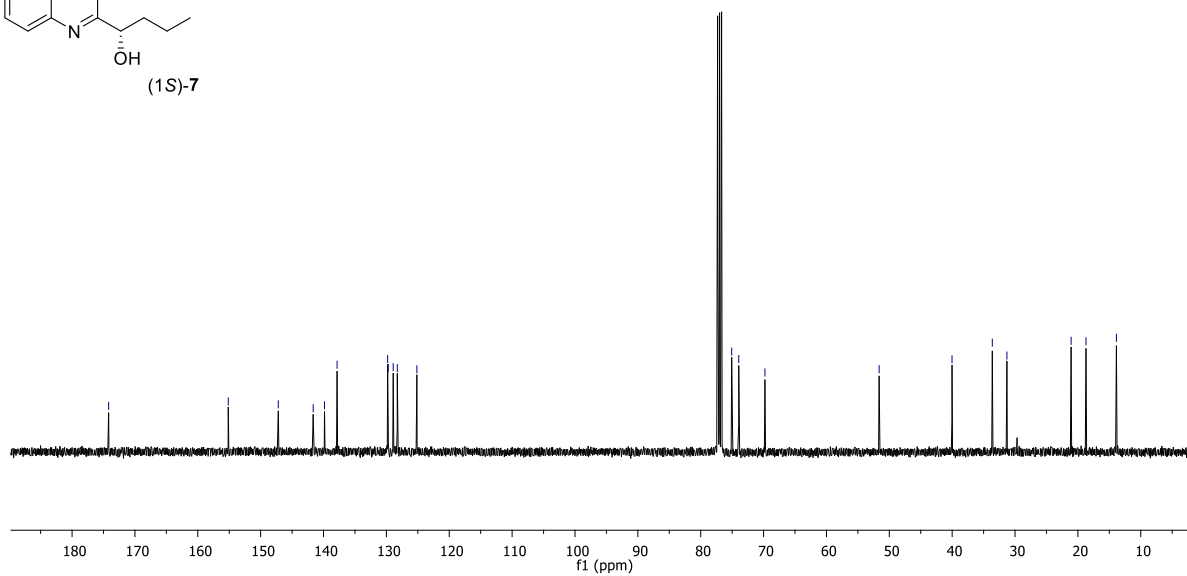

$^1\text{H}$  NMR (400 MHz,  $\text{CDCl}_3$ )

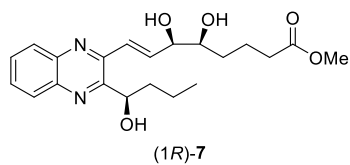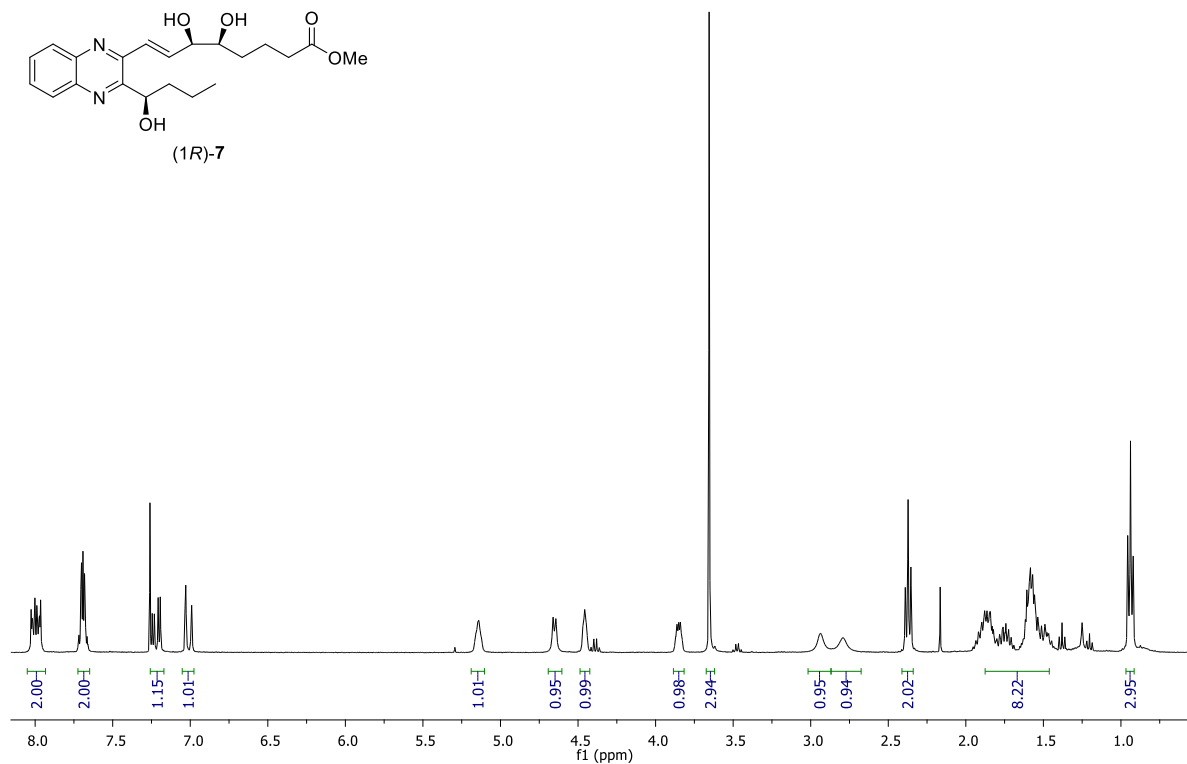

$^{13}\text{C}$  NMR (101 MHz,  $\text{CDCl}_3$ )

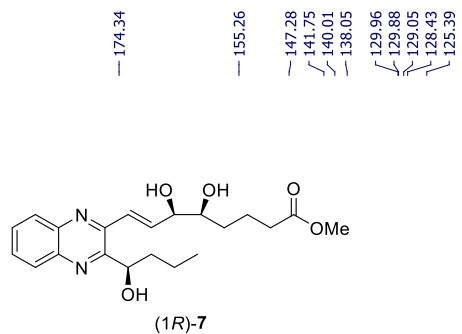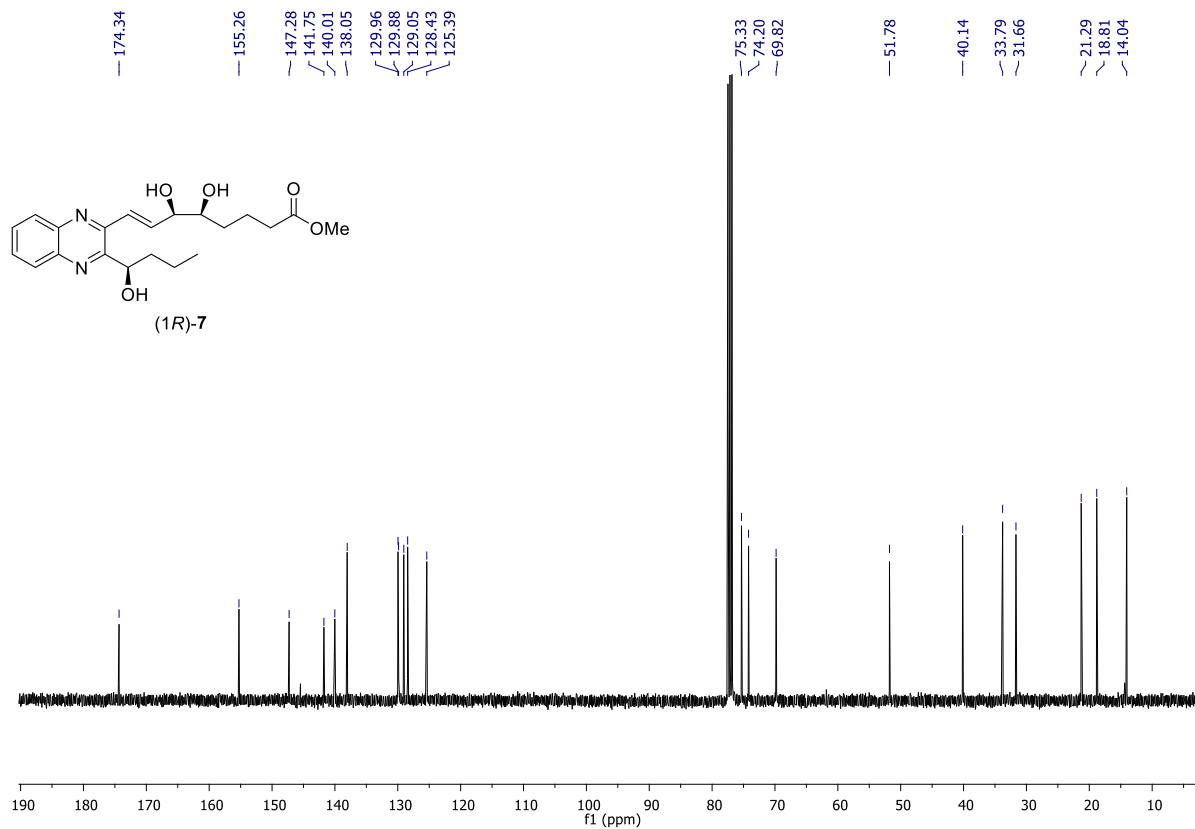

## Chromatograms

### 1-(3-Chloroquinoxalin-2-yl)hexan-1-ol (14)

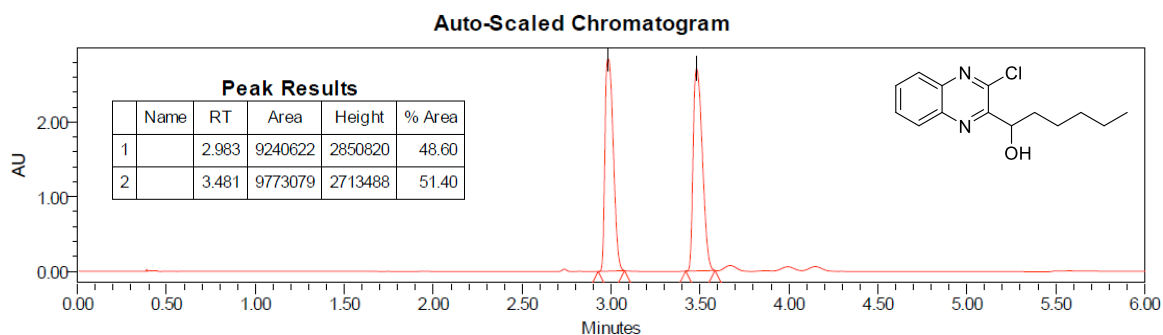

### (R)-1-(3-Chloroquinoxalin-2-yl)hexan-1-ol ((1R)-14)

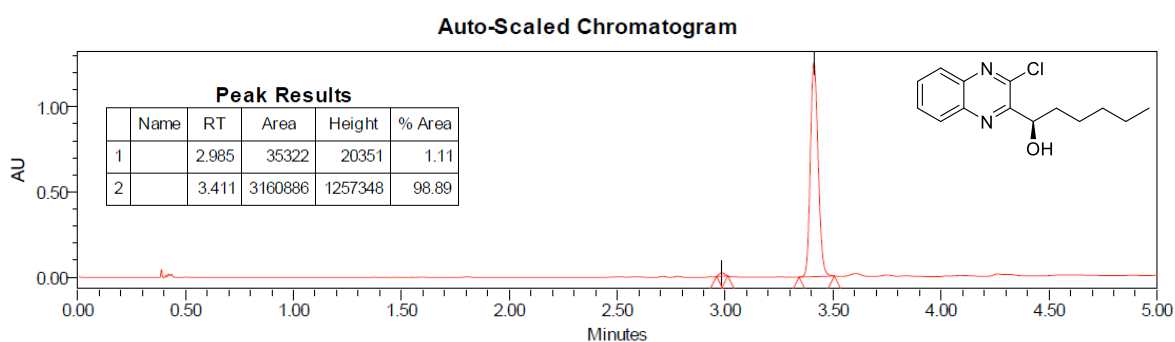

$ee = 98\%$  as determined by SFC using a Chiralpak IC column (ACN:CO<sub>2</sub>, gradient 99:1 0-1 min, then gradient to 60:40 until 5 min, 3mL/min),  $R_t = 3.00\text{min}$  (*S*)-enantiomer, 3.41 (*R*)-enantiomer.

### (S)-1-(3-Chloroquinoxalin-2-yl)hexan-1-ol ((1S)-14)

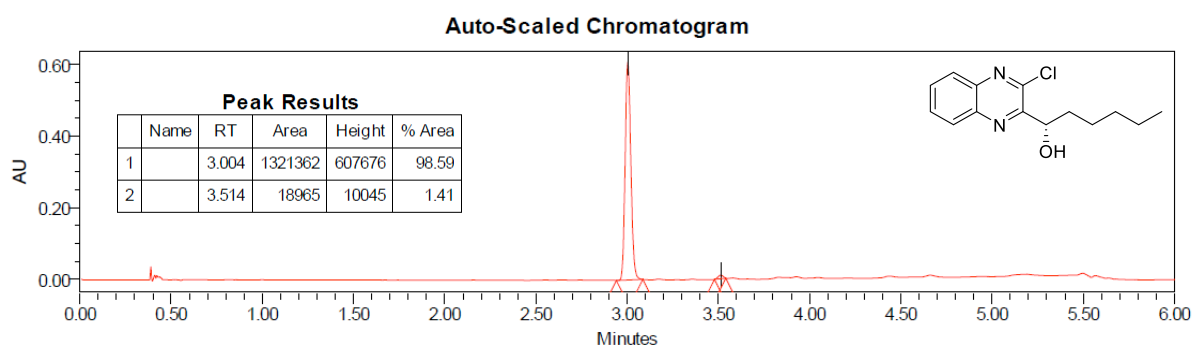

$ee = 97\%$  as determined by SFC using a Chiralpak IC column (ACN:CO<sub>2</sub>, gradient 99:1 0-1 min, then gradient to 60:40 until 5 min, 3mL/min),  $R_t = 3.00\text{min}$  (*S*)-enantiomer, 3.41 (*R*)-enantiomer.

### (R)-1-(3-Bromoquinoxalin-2-yl)butan-1-ol ((1R)-29)

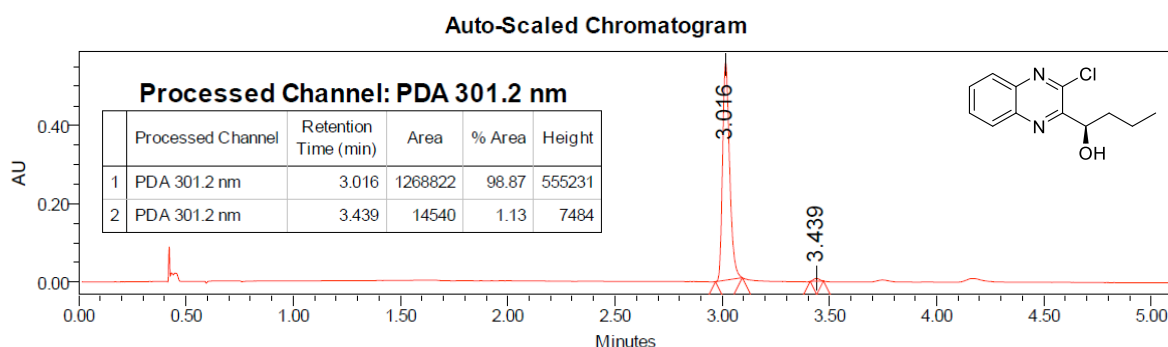

$ee = 98\%$  as determined by SFC using a Chiralpak IC column ( $\text{CO}_2:\text{ACN}$ , gradient 99:1 0-1 min, then gradient to 60:40 until 5 min, 3mL/min),  $R_t = 3.02$  min (*S*)-enantiomer, 3.45 min (*R*)-enantiomer.

### (S)-1-(3-Bromoquinoxalin-2-yl)butan-1-ol ((1S)-29)

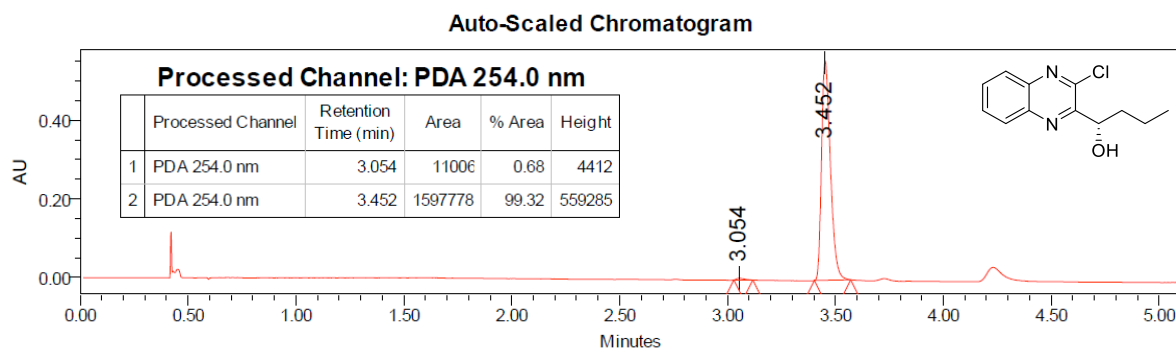

$ee = 98\%$  as determined by SFC using a Chiralpak IC column ( $\text{CO}_2:\text{ACN}$ , gradient 99:1 0-1 min, then gradient to 60:40 until 5 min, 3mL/min),  $R_t = 3.02$  min (*S*)-enantiomer, 3.45 min (*R*)-enantiomer.

### (R)-1-(3-Bromoquinoxalin-2-yl)octan-1-ol ((1R)-30)

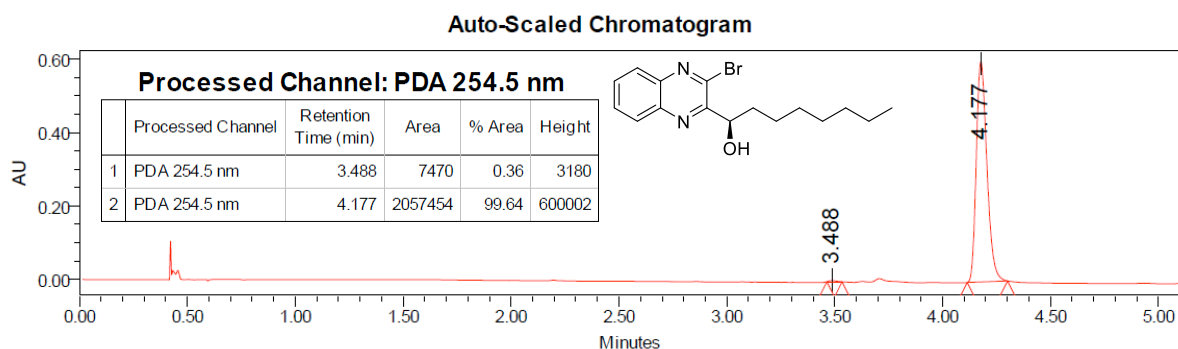

$ee = 99\%$  as determined by SFC using a Chiralpak IC column ( $\text{CO}_2:\text{ACN}$ , gradient 99:1 0-1 min, then gradient to 60:40 until 5 min, 3mL/min),  $R_t = 3.43$  min (*S*)-enantiomer, 4.18 min (*R*)-enantiomer.

**(S)-1-(3-Bromoquinoxalin-2-yl)octan-1-ol ((1S)-30)**

Auto-Scaled Chromatogram

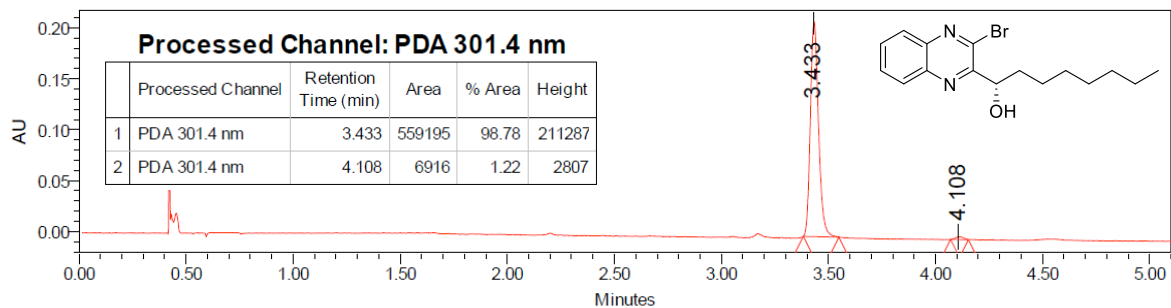

*ee* = 98 % as determined by SFC using a Chiralpak IC column (CO<sub>2</sub>:ACN, gradient 99:1 0-1 min, then gradient to 60:40 until 5 min, 3mL/min), *R*<sub>t</sub> = 3.43 min (*S*)-enantiomer, 4.18 min (*R*)-enantiomer.

## Chromatograms of analogues submitted for biological evaluation:

**Method:** Purity determined by SFC using a Chiralpak IC column (MeCN:CO<sub>2</sub>, gradient 99:1 0-1 min, then gradient to 60:40 until 10 min, 3mL/min),

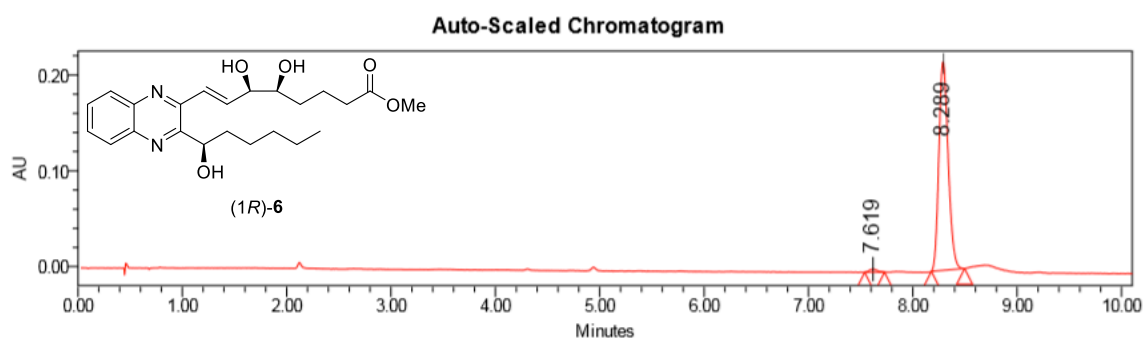

### Processed Channel: PDA 281.0 nm

| Processed Channel | Retention Time (min) | Area    | % Area | Height |
|-------------------|----------------------|---------|--------|--------|
| 1 PDA 281.0 nm    | 7.619                | 16398   | 1.20   | 3212   |
| 2 PDA 281.0 nm    | 8.289                | 1345165 | 98.80  | 217536 |

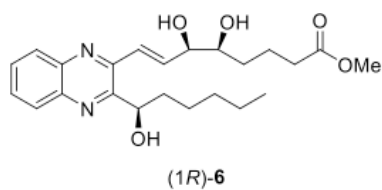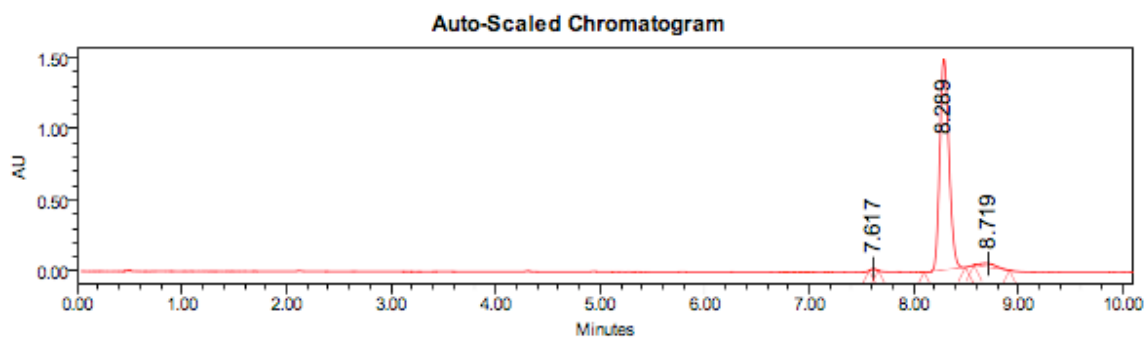

### Processed Channel: PDA 254.0 nm

| Processed Channel | Retention Time (min) | Area    | % Area | Height  |
|-------------------|----------------------|---------|--------|---------|
| 1 PDA 254.0 nm    | 7.617                | 38344   | 0.41   | 11930   |
| 2 PDA 254.0 nm    | 8.289                | 9016729 | 96.57  | 1480195 |
| 3 PDA 254.0 nm    | 8.719                | 281955  | 3.02   | 26952   |



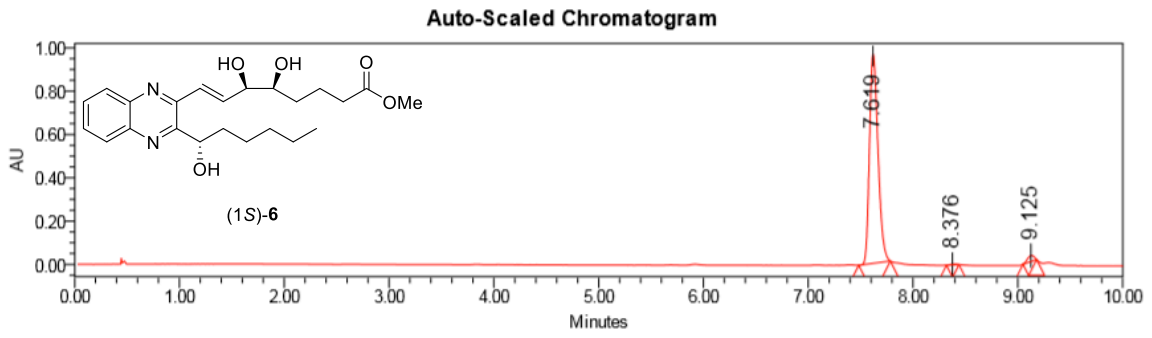

**Processed Channel: PDA 268.5 nm**

|   | Processed Channel | Retention Time (min) | Area    | % Area | Height |
|---|-------------------|----------------------|---------|--------|--------|
| 1 | PDA 268.5 nm      | 7.619                | 5452089 | 97.61  | 965491 |
| 2 | PDA 268.5 nm      | 8.376                | 12305   | 0.22   | 2967   |
| 3 | PDA 268.5 nm      | 9.125                | 12113   | 2.17   | 27646  |

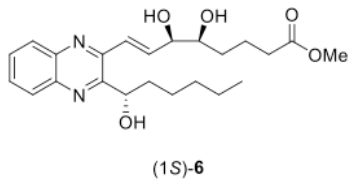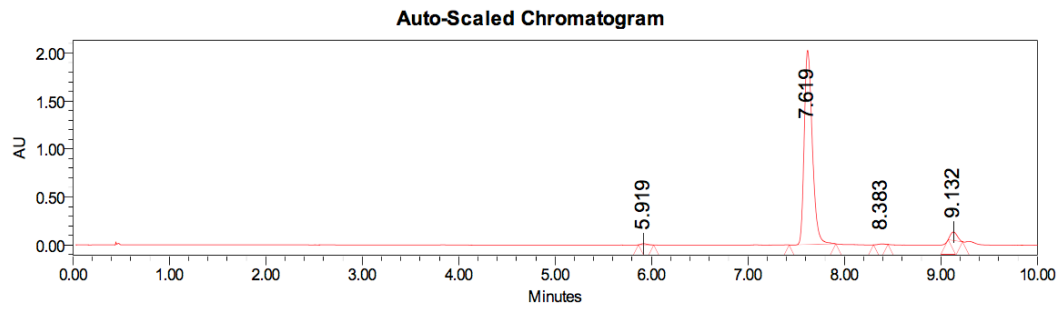

**Processed Channel: PDA 254.0 nm**

|   | Processed Channel | Retention Time (min) | Area    | % Area | Height  |
|---|-------------------|----------------------|---------|--------|---------|
| 1 | PDA 254.0 nm      | 5.919                | 53709   | 0.44   | 11891   |
| 2 | PDA 254.0 nm      | 7.619                | 1177555 | 95.81  | 2022987 |
| 3 | PDA 254.0 nm      | 8.383                | 35860   | 0.29   | 7423    |
| 4 | PDA 254.0 nm      | 9.132                | 425216  | 3.46   | 88540   |

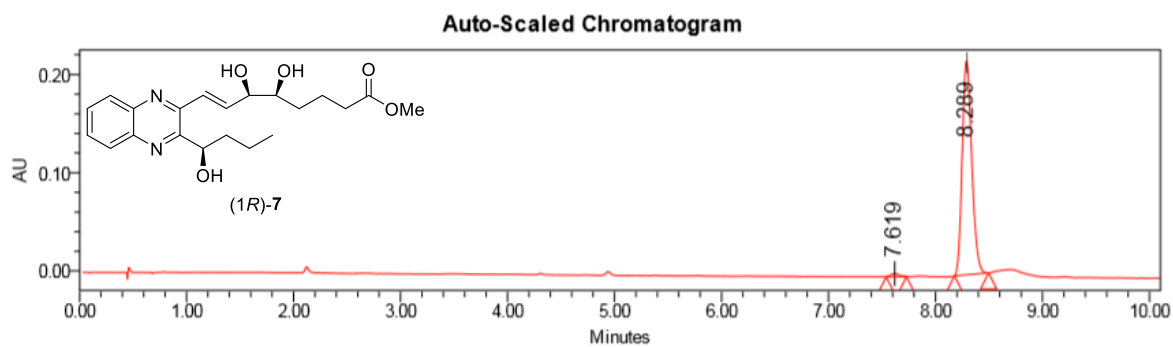

**Processed Channel: PDA 281.0 nm**

|   | Processed Channel | Retention Time (min) | Area    | % Area | Height |
|---|-------------------|----------------------|---------|--------|--------|
| 1 | PDA 281.0 nm      | 7.619                | 16398   | 1.20   | 3212   |
| 2 | PDA 281.0 nm      | 8.289                | 1345165 | 98.80  | 217536 |

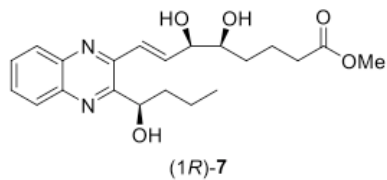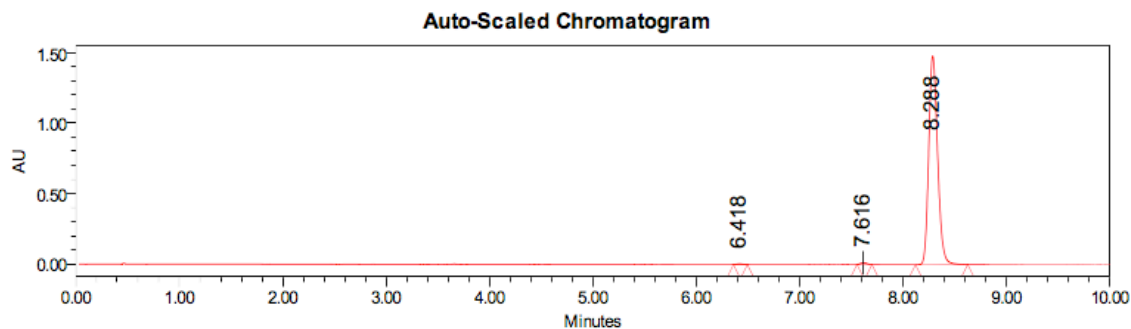

**Processed Channel: PDA 254.0 nm**

|   | Processed Channel | Retention Time (min) | Area    | % Area | Height  |
|---|-------------------|----------------------|---------|--------|---------|
| 1 | PDA 254.0 nm      | 6.418                | 22887   | 0.26   | 5274    |
| 2 | PDA 254.0 nm      | 7.616                | 53820   | 0.61   | 12150   |
| 3 | PDA 254.0 nm      | 8.288                | 8803825 | 99.14  | 1481634 |

### Auto-Scaled Chromatogram

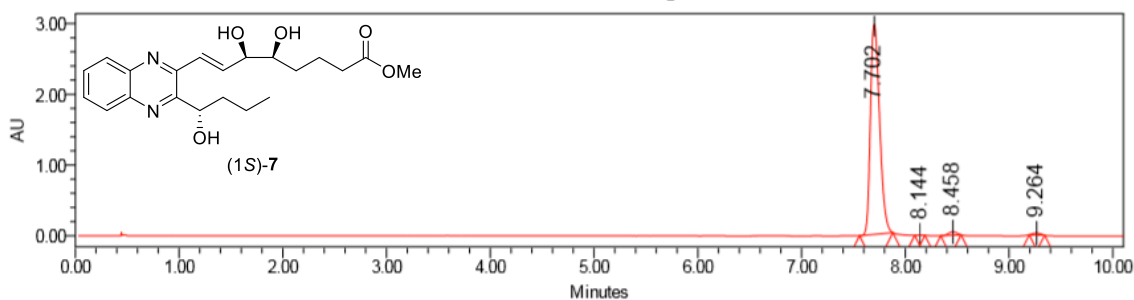

### Processed Channel: PDA 254.0 nm

|   | Processed Channel | Retention Time (min) | Area     | % Area | Height  |
|---|-------------------|----------------------|----------|--------|---------|
| 1 | PDA 254.0 nm      | 7.702                | 18243920 | 97.76  | 2971477 |
| 2 | PDA 254.0 nm      | 8.144                | 13637    | 0.07   | 3832    |
| 3 | PDA 254.0 nm      | 8.458                | 269875   | 1.45   | 48605   |
| 4 | PDA 254.0 nm      | 9.264                | 134743   | 0.72   | 26059   |

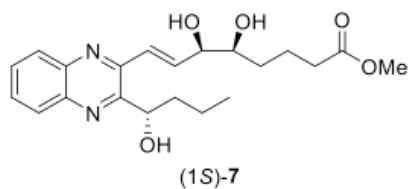

### Auto-Scaled Chromatogram

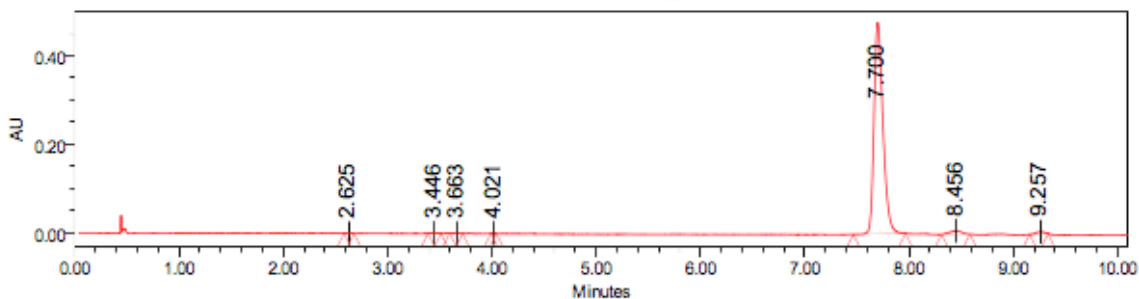

### Processed Channel: PDA 281.0 nm

|   | Processed Channel | Retention Time (min) | Area    | % Area | Height |
|---|-------------------|----------------------|---------|--------|--------|
| 1 | PDA 281.0 nm      | 2.625                | 1209    | 0.04   | 384    |
| 2 | PDA 281.0 nm      | 3.446                | 5585    | 0.19   | 1497   |
| 3 | PDA 281.0 nm      | 3.663                | 2385    | 0.08   | 663    |
| 4 | PDA 281.0 nm      | 4.021                | 1310    | 0.04   | 802    |
| 5 | PDA 281.0 nm      | 7.700                | 2837188 | 96.54  | 477519 |
| 6 | PDA 281.0 nm      | 8.456                | 61807   | 2.10   | 6215   |
| 7 | PDA 281.0 nm      | 9.257                | 29455   | 1.00   | 5238   |

### Auto-Scaled Chromatogram

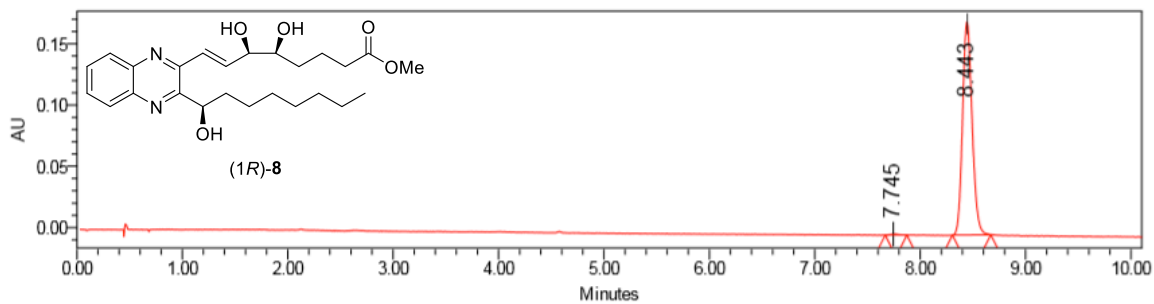

### Processed Channel: PDA 281.0 nm

|   | Processed Channel | Retention Time (min) | Area    | % Area | Height |
|---|-------------------|----------------------|---------|--------|--------|
| 1 | PDA 281.0 nm      | 7.745                | 4270    | 0.39   | 848    |
| 2 | PDA 281.0 nm      | 8.443                | 1095276 | 99.61  | 173775 |

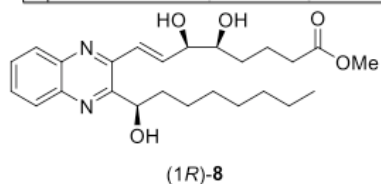

### Auto-Scaled Chromatogram

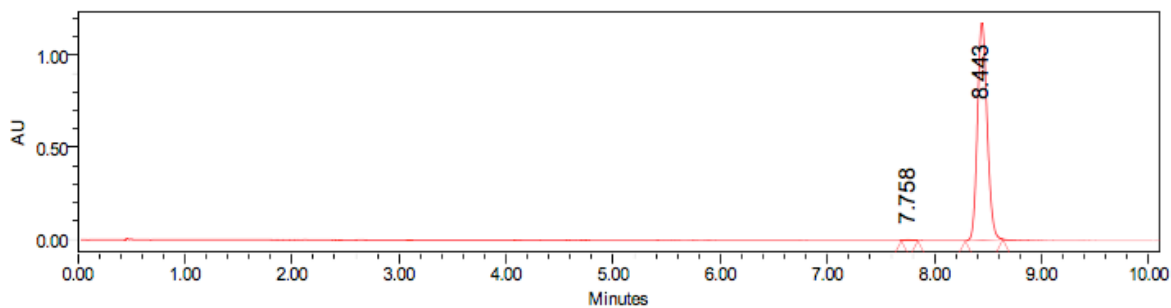

### Processed Channel: PDA 254.0 nm

|   | Processed Channel | Retention Time (min) | Area    | % Area | Height  |
|---|-------------------|----------------------|---------|--------|---------|
| 1 | PDA 254.0 nm      | 7.758                | 21538   | 0.29   | 4540    |
| 2 | PDA 254.0 nm      | 8.443                | 7397535 | 99.71  | 1181227 |

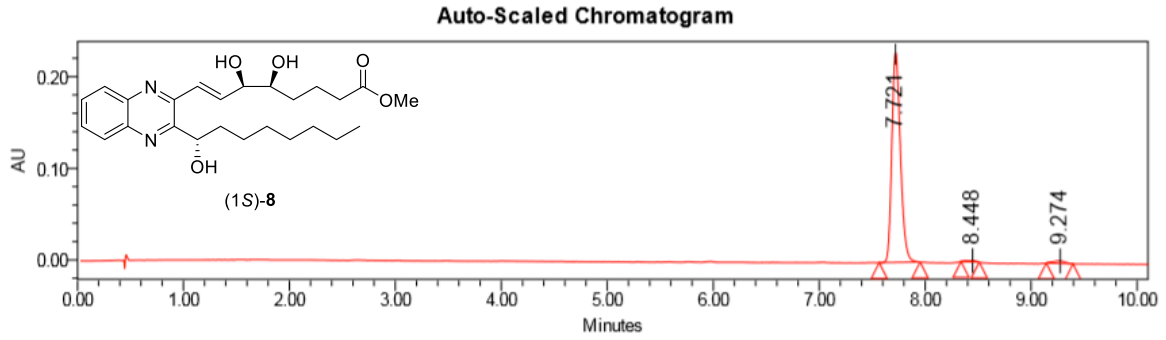

**Processed Channel: PDA 281.0 nm**

|   | Processed Channel | Retention Time (min) | Area    | % Area | Height |
|---|-------------------|----------------------|---------|--------|--------|
| 1 | PDA 281.0 nm      | 7.721                | 1283251 | 97.62  | 229069 |
| 2 | PDA 281.0 nm      | 8.448                | 9185    | 0.70   | 1379   |
| 3 | PDA 281.0 nm      | 9.274                | 22046   | 1.68   | 2778   |

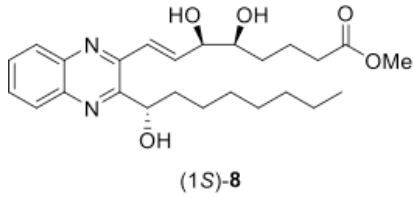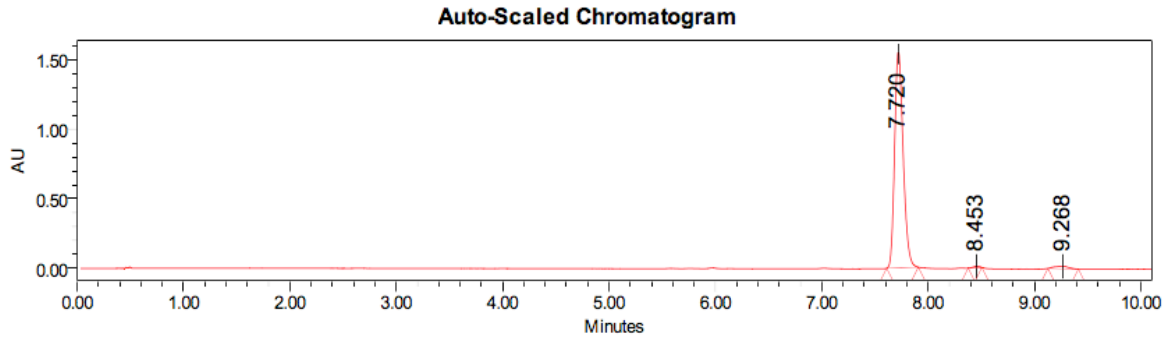

**Processed Channel: PDA 254.0 nm**

|   | Processed Channel | Retention Time (min) | Area    | % Area | Height  |
|---|-------------------|----------------------|---------|--------|---------|
| 1 | PDA 254.0 nm      | 7.720                | 8630693 | 97.76  | 1551194 |
| 2 | PDA 254.0 nm      | 8.453                | 41366   | 0.47   | 10083   |
| 3 | PDA 254.0 nm      | 9.268                | 156625  | 1.77   | 17262   |

## Supplementary Tables

**Supplementary Table 1.** PD analysis coding.

**Supplementary Table 2.** PD analysis of the effects of QNX-sLXms on NF- $\kappa$ B activity.

**Supplementary Table 3.** PD analysis of the effects of QNX-sLXms on cytokine release.

**Supplementary Table 4.** Safety Index of QNX-sLXms.

**Supplementary Table 5.** PD analysis of the effects of (*R*)-**6** on macrophage phagocytosis.

**Supplementary Table 6.** Effect of sLXm (*R*)-**6** on murine carrageenan-induced paw oedema.

**Supplementary Table 7.** PD analysis of the effects on intracellular calcium mobilization of (*R*)-**6** QNX-sLXm lead.

## Supplementary Figures

**Supplementary Figure 1.** Effect of series (**17**), (**7**), (**8**) of QNX-sLXms on LPS-induced NF- $\kappa$ B-driven luciferase activity in monocytes.

**Supplementary Figure 2.** Effect of series (**6**) of QNX-sLXms on LPS-induced pro-inflammatory cytokine release in monocytes.

**Supplementary Figure 3.** Effect of series (**7**) and (**8**) of QNX-sLXms on LPS-induced pro-inflammatory cytokine release in monocytes.

.

**Supplementary Figure 4.** Intrinsic cytotoxic profile of series (**17**), (**7**), (**8**) of QNX-sLXms.

**Supplementary Figure 5.** Extrinsic cytotoxic profile of series (**17**), (**7**), (**8**) of QNX-sLXms.

**Supplementary Figure 6.** Cell model for intracellular calcium flux measurement.

**Supplementary Figure 7.** Intracellular calcium flux kinetic traces.

## Supplementary Tables

| RELATIVE "PD Score"                                                          |                |    |
|------------------------------------------------------------------------------|----------------|----|
| <b>Rel. Efficacy</b><br>( <i>I<sub>max</sub></i> or <i>E<sub>max</sub></i> ) | $0.5 < x < 1$  | -1 |
|                                                                              | $x = 1$        | 0  |
|                                                                              | $1 < x < 1.5$  | 1  |
|                                                                              | $x \geq 1.5$   | 2  |
| <b>Rel. Potency</b><br>( <i>IC<sub>50</sub></i> or <i>E<sub>50</sub></i> )   | $x < 0.1$      | -2 |
|                                                                              | $0.1 < x < 1$  | -1 |
|                                                                              | $x = 1$        | 0  |
|                                                                              | $1 < x < 5$    | 1  |
|                                                                              | $x \geq 5$     | 2  |
| <b>Rel. Slope</b><br>( <i>HS</i> )                                           | $x = 0$        | -4 |
|                                                                              | $x < 0.01$     | -2 |
|                                                                              | $0.01 < x < 1$ | -1 |
|                                                                              | $x = 1$        | 0  |
|                                                                              | $1 < x < 10$   | 1  |
|                                                                              | $x \geq 10$    | 2  |

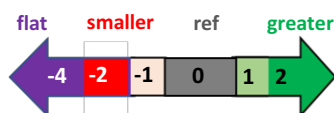

**Supplementary Table 1 - PD analysis coding.** For the *in vitro* assays, a PD analysis was conducted for the tested molecules to determine the PD profile *per se* and relative to LXA<sub>4</sub> (1). The 'coding' of the heat-map indicates the arbitrary criteria to assign points to each single PD component [efficacy, potency and slope], in order to generate a final (aggregate) 'Relative PD score'.

| Cell Line   | Differentiation stage | Assay         | Class  | Group  | Compound | Efficacy             |           | Potency               |           | Slope |            | (Single component) Rel. Score |           |          | (Aggregate)   |     |
|-------------|-----------------------|---------------|--------|--------|----------|----------------------|-----------|-----------------------|-----------|-------|------------|-------------------------------|-----------|----------|---------------|-----|
|             |                       |               |        |        |          | I <sub>max</sub> (%) | Rel. Eff. | IC <sub>50</sub> (nM) | Rel. Pot. | HS    | Rel. Slope | Rel. Eff.                     | Rel. Pot. | Rel. Sl. | Rel. PD Score |     |
| THP-1 Lucia | Monocytes             | NFκB activity | Native | Ref    | 1        | 24 ± 1               | 1         | 0.060                 | 1         | -10   | 1          | ref                           | ref       | ref      | ref           | ref |
|             |                       |               | IMZ    | Ctr    | 5        | 44 ± 9               | 1.83      | 0.0002                | 300       | 90    | -9         | 2                             | 2         | 1        | 5             | ●●● |
|             |                       |               | A      | (R)-17 | 18 ± 7   | 0.75                 | 0.001     | 60                    | 0         | 0     | -1         | 2                             | -4        | -3       |               |     |
|             |                       |               |        | (S)-17 | 19 ± 3   | 0.79                 | 0.003     | 24                    | 0         | 0     | -1         | 2                             | -4        | -3       |               |     |
|             |                       |               | B      | (R)-6  | 38 ± 9   | 1.58                 | 0.025     | 2.4                   | -566      | 57    | 2          | 1                             | 2         | 5        | ●●●           |     |
|             |                       |               |        | (S)-6  | 34 ± 9   | 1.42                 | na        | na                    | -4.7      | 0.47  | 1          | na                            | 1         | 2        | ●●            |     |
|             |                       |               | C      | (R)-7  | 29 ± 7   | 1.21                 | 4.000     | 0.015                 | -5.5      | 0.55  | 1          | -2                            | -1        | -2       |               |     |
|             |                       |               |        | (S)-7  | 36 ± 9   | 1.50                 | 1.000     | 0.1                   | -6        | 0.60  | 2          | -2                            | -1        | -1       |               |     |
|             |                       |               | D      | (R)-8  | 23 ± 7   | 0.96                 | 0.040     | 1.5                   | -4.9      | 0.49  | 0          | 1                             | -1        | 0        |               |     |
|             |                       |               |        | (S)-8  | 23 ± 8   | 0.96                 | 0.010     | 6                     | 0         | 0     | 0          | 2                             | -4        | -2       |               |     |

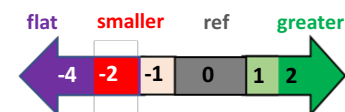

**Supplementary Table 2 - PD analysis of the effects of QNX-sLXms on NF-κB activity.** THP-1 LUCIA® monocytes were treated with appropriate controls or QNX-sLXms, as above described. The table summarises the effects of QNX-sLXms on LPS-induced NF-κB activity in monocytes. In order to generate an aggregate *PD score*, three PD components were calculated: I<sub>max</sub>, IC<sub>50</sub> and HS, as a measure of efficacy, potency and slope, respectively, as absolute values or relative to LXA<sub>4</sub>. (Refer to **Supp. Table 1** for heat-map ‘coding’).



| Cell Line      | Differentiation stage | Assay | Class  | Group  | Compound | Efficacy |           | Potency   |           | Slope |          | (Single component) Rel. score |           |          | (Aggregate)   |               |
|----------------|-----------------------|-------|--------|--------|----------|----------|-----------|-----------|-----------|-------|----------|-------------------------------|-----------|----------|---------------|---------------|
|                |                       |       |        |        |          | lmax (%) | Rel. Eff. | IC50 (nM) | Rel. Pot. | HS    | Rel. Sl. | Rel. Eff.                     | Rel. Pot. | Rel. Sl. | Rel. PD Score | Rel. PD Score |
| THP-1<br>Lucia | Monocytes             | IL6   | Native | Ctr    | 1        | 99 ± 1   | 1         | 0.001     | 1         | -239  | 1        | ref                           | ref       | ref      | ref           | ref           |
|                |                       |       |        | QNX    | B        | (R)-6    | 84 ± 2    | 0.85      | 0.001     | 1     | -174     | 0.73                          | -1        | 0        | -1            | -2            |
|                |                       |       | (S)-6  |        |          | 98 ± 1   | 0.99      | 0.001     | 1         | -576  | 2.41     | 0                             | 0         | 2        | 2             | •             |
|                |                       |       | C      |        | (R)-7    | 138 ± 36 | 1.39      | 0.100     | 0.01      | 0     | 0        | -2                            | -2        | -4       | -8            |               |
|                |                       |       |        |        | (S)-7    | 19 ± 13  | 0.19      | 15.000    | 0.0001    | 0     | 0        | -2                            | -2        | -4       | -8            |               |
|                |                       |       | D      |        | (R)-8    | 21 ± 4   | 0.21      | 0.001     | 1         | 0     | 0        | -2                            | 0         | -4       | -6            |               |
|                |                       |       |        |        | (S)-8    | 28 ± 5   | 0.28      | 0.004     | 0.250     | -80   | 0.33     | -2                            | -1        | -1       | -4            |               |
|                |                       |       | IL1β   | Native | Ctr      | 1        | 95 ± 1    | 1         | 0.001     | 1     | -188     | 1                             | ref       | ref      | ref           | ref           |
|                |                       | QNX   |        |        | B        | (R)-6    | 73 ± 2    | 0.77      | 0.001     | 1     | 5.5      | -0.03                         | -1        | 0        | -1            | -2            |
|                |                       |       |        | (S)-6  |          | 126 ± 42 | 1.33      | 1.000     | 0.001     | 0.16  | -0.001   | -2                            | -2        | -2       | -6            |               |
|                |                       |       |        | C      | (R)-7    | 67 ± 3   | 0.71      | 0.002     | 0.5       | -90.8 | 0.48     | -1                            | -1        | -1       | -3            |               |
|                |                       |       |        |        | (S)-7    | 54 ± 14  | 0.57      | 0.002     | 0.5       | -95.1 | 0.51     | -2                            | -1        | -1       | -4            |               |
|                |                       |       |        | D      | (R)-8    | 57 ± 12  | 0.60      | 0.001     | 1         | -90.7 | 0.48     | -2                            | 0         | -1       | -3            |               |
|                |                       |       |        |        | (S)-8    | 59 ± 20  | 0.62      | 0.001     | 1         | -95.1 | 0.51     | -2                            | 0         | -1       | -3            |               |
|                |                       | INFγ  |        | Native | Ctr      | 1        | 72 ± 4    | 1         | 0.001     | 1     | -448     | 1                             | ref       | ref      | ref           | ref           |
|                |                       |       | QNX    |        | B        | (R)-6    | 62 ± 1    | 0.86      | 0.001     | 1     | -494     | 1                             | -1        | 0        | 0             | -1            |
|                |                       |       |        | (S)-6  |          | 74 ± 4   | 1.03      | 1.800     | 0.001     | -0.6  | 0.001    | 0                             | -2        | -2       | -4            |               |
|                |                       |       |        | C      | (R)-7    | 90 ± 2   | 1.25      | 0.001     | 1         | -431  | 1        | 1                             | 0         | 0        | 1             | •             |
|                |                       |       |        |        | (S)-7    | 85 ± 4   | 1.18      | 0.002     | 0.500     | -0.23 | 0.001    | 1                             | -1        | -2       | -2            |               |
|                |                       |       |        | D      | (R)-8    | 60 ± 8   | 0.83      | 0.001     | 1         | -457  | 1        | -1                            | 0         | 0        | -1            |               |
|                |                       |       |        |        | (S)-8    | 61 ± 8   | 0.85      | 0.001     | 1         | -97   | 0.22     | -1                            | 0         | -1       | -2            |               |

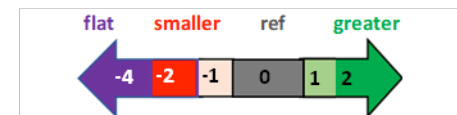

**Supplementary Table 3 - PD analysis of the effects of QNX-sLXms on cytokine release.** THP-1 LUCIA® monocytes were treated with appropriate controls or QNX-sLXms, as above described. The tables summarise the effects of QNX-sLXms on LPS-induced release of pivotal pro-inflammatory cytokines in monocytes. In order to generate an aggregate PD score, three pharmacodynamic components were calculated: observed or predicted  $I_{max}$ ;  $IC_{50}$  and HS, as a measure, respectively, of efficacy, potency and slope, as absolute values or relative to LXA<sub>4</sub>. (Refer to **Supp. Table 1** for the heat-map ‘coding’).

|         |        | SAFETY PROFILE         |                       |          |                                    |
|---------|--------|------------------------|-----------------------|----------|------------------------------------|
|         |        | Extrinsic Activity     | Intrinsic Toxicity    |          | Safety Index                       |
|         |        | hIC <sub>50</sub> (pM) | TC <sub>50</sub> (pM) | Level    | TC <sub>50</sub> /IC <sub>50</sub> |
| Group A | (R)-17 | 10                     | 100                   | Moderate | 10                                 |
|         | (S)-17 | 3                      | 100                   | Moderate | 33                                 |
| Group B | (R)-6  | 25                     | 500                   | Low      | 20                                 |
|         | (S)-6  | 20                     | 200                   | Low-Mod. | 10                                 |
| Group C | (R)-7  | 100                    | 2,000                 | Low-Mod. | 20                                 |
|         | (S)-7  | 15,000                 | 110,000               | Low-Mod. | 7                                  |
| Group D | (R)-8  | 200                    | 10,000                | Low-Mod. | 50                                 |
|         | (S)-8  | 10                     | 100                   | Low      | 10                                 |

**Supplementary Table 4 - Safety Index of QNX-sLXms.** The table displays the *Safety index* ( $S_i$ ) calculated for each tested sLXm, as the ratio between the half-maximal *intrinsic LDH-associated* toxic activity ( $TC_{50}$ ) and the half-maximal *extrinsic* biological activity of the same compound (the highest  $IC_{50}$  among the various LPS-challenged assays, as a measure of anti-inflammatory activity).

| Cell Line | Differentiation stage | Assay        | Class | Group | Compound | Efficacy  |           | Potency   |           | Single comp. score |           | Aggregate     |               |
|-----------|-----------------------|--------------|-------|-------|----------|-----------|-----------|-----------|-----------|--------------------|-----------|---------------|---------------|
|           |                       |              |       |       |          | Emax (%)  | Rel. Eff. | EC50 (nM) | Rel. Pot. | Rel Eff.           | Rel. Pot. | Rel. PD Score | Rel. PD Score |
| THP-1     | Mf0 Macrophage        | Phagocytosis | SPMs  | LXs   | 1        | 4.2 ± 0.5 | 0         | 5         | 1         | ref                | ref       | ref           | ref           |
|           |                       |              |       |       | LXB4     | 2.2 ± 0.4 | 0.00      | 5         | 1         | -2                 | 0         | -2            |               |
|           |                       |              |       | Rvs   | RvD1     | 3.6 ± 0.7 | 0.00      | 0.0005    | 10000     | -1                 | 2         | 1             | ●             |
|           |                       |              |       |       | RvE1     | 1.7 ± 0.2 | 0.00      | 0.0010    | 5000      | -2                 | 2         | 0             |               |
|           |                       |              | sLXms | IMZ   | 5        | 4.2 ± 0.7 | 0.00      | 0.010     | 500       | 0                  | 2         | 2             | ●●            |
| QNX       | (R)-6                 | 3.4 ± 1.3    | 0.00  | 0.050 | 100      | -1        | 2         | 1         | ●         |                    |           |               |               |

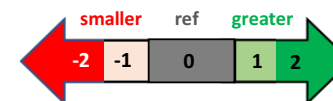

**Supplementary Table 5 - PD analysis of the effects of (R)-6 on macrophage phagocytosis.** PMA-triggered THP-1-derived-MF0 macrophages were treated with appropriate controls or sLXms, as above described. The tables summarise the effects of tested molecules on macrophage phagocytosis. In order to generate an aggregate *PD score*, three PD components were calculated: observed or predicted  $I_{max}$ ,  $IC_{50}$  and *Hill Slope (HS)*, as a measure, respectively, of *efficacy*, *potency* and *slope*, as absolute values or relative to LXA<sub>4</sub>. (Refer to **Supp. Table 1** for *heat-map 'coding'*).

| Time | % relative to carrageenan-induced level |             |            |             |            |             |            |             |
|------|-----------------------------------------|-------------|------------|-------------|------------|-------------|------------|-------------|
|      | Veh                                     |             | Naproxen   |             | (R)-6      |             | (R)-17     |             |
|      | %                                       | % reduction | %          | % reduction | %          | % reduction | %          | % reduction |
| 4h   | <b>100</b>                              | 0           | <b>118</b> | 18          | <b>116</b> | 16          | <b>103</b> | 3           |
| 8h   | <b>100</b>                              | 0           | <b>40</b>  | -60         | <b>63</b>  | -37         | <b>84</b>  | -16         |
| 24h  | <b>100</b>                              | 0           | <b>55</b>  | -45         | <b>72</b>  | -28         | <b>92</b>  | -8          |
| 48h  | <b>100</b>                              | 0           | <b>160</b> | 60          | <b>53</b>  | -47         | <b>149</b> | 49          |
| 72h  | <b>100</b>                              | 0           | <b>550</b> | 450         | <b>110</b> | 10          | <b>220</b> | 120         |

**Supplementary Table 6 - Effect of sLXm (R)-6 on murine carrageenan-induced paw oedema.** (R)-6, (R)-17 (2 µg / kg) or Naproxen (50 mg / kg, p.o.) were administered 30 min before the intra-paw injection of 1% carrageenan into male C57bl/6 mice. Paw swelling was monitored over time using an external lever gauge. (a) Graph shows paw-oedema index. 1-way ANOVA statistical analysis has been performed \* = p < 0.05, \*\* = p < 0.01, \*\*\* = p < 0.001. (b) Table displays the index of each tested molecule relative to the carrageenan-induced levels. Data are presented as mean ± SEM, n=3 mice/treatment group.

| Cell Line | Transfection | Assay                              | Class  | Group | Compound | Efficacy |           | Potency  |           | Slope |            | (Single component) Rel. Score |           |          | (Aggregate)   |     |
|-----------|--------------|------------------------------------|--------|-------|----------|----------|-----------|----------|-----------|-------|------------|-------------------------------|-----------|----------|---------------|-----|
|           |              |                                    |        |       |          | Emax (%) | Rel. Eff. | E50 (nM) | Rel. Pot. | HS    | Rel. Slope | Rel. Eff.                     | Rel. Pot. | Rel. Sl. | Rel. PD Score |     |
| HEK-293   | FPR2+/Gαq+   | ALX/FPR2<br>receptor<br>activation | Native | Ref   | 1        | 100      | 1         | 0.0012   | 1         | 150   | 1          | ref                           | ref       | ref      | ref           | ref |
|           |              |                                    | IMZ    | ctr   | 5        | 99 ± 17  | 0.99      | 0.0012   | 1         | 258   | 1.72       | 0                             | 0         | 2        | 2             | ●   |
|           |              |                                    | QNX    | B     | (R)-6    | 61 ± 10  | 0.61      | 0.0012   | 1         | 220   | 1.46       | -2                            | 0         | 1        | -1            |     |

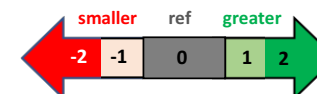

**Supplementary Table 7. PD analysis of the effects on intracellular calcium mobilization of (R)-6 QNX-sLXm lead.** Stably double transfected FPR2<sup>+</sup>/Gα<sub>q</sub><sup>+</sup> HEK-293 were treated with appropriate controls or QNX-sLXm lead, as above described. The tables summarise the effects of tested molecules on intracellular calcium flux. In order to generate an aggregate *PD score*, three PD components were calculated: observed or predicted  $E_{max}$ ;  $EC_{50}$  and  $HS$ , as a measure, respectively, of *efficacy*, *potency* and *slope*, as absolute values or relative to LXA<sub>4</sub>. (Refer to **Supp. Table 1** for *heat-map 'coding'*).

## Supplementary Figures

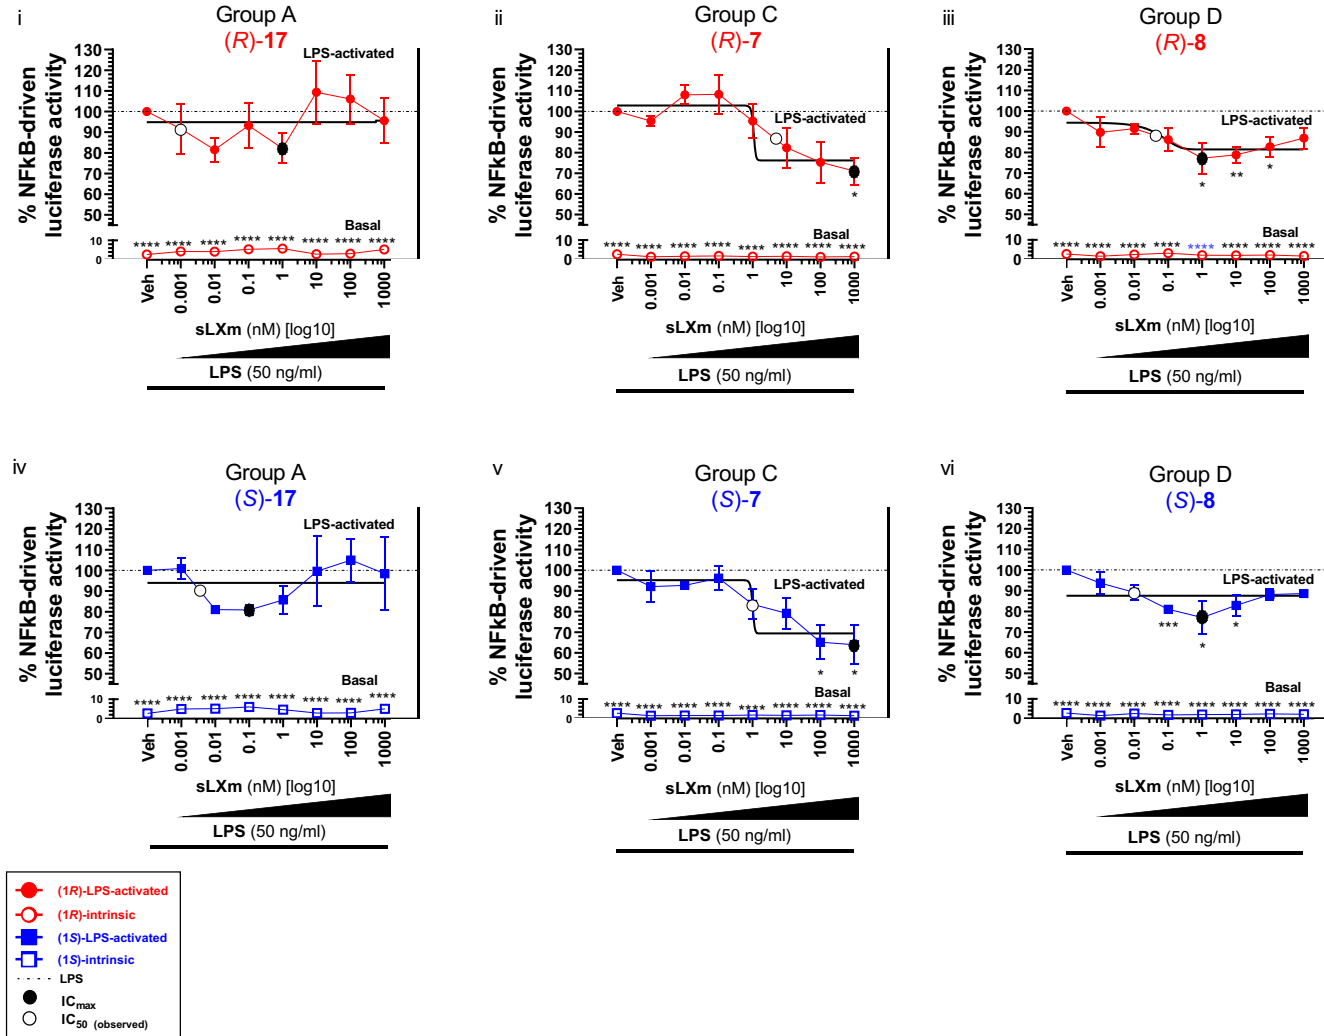

**Supplementary Figure 1 - Effect of series (17), (7), (8) of QNX-sLXms on LPS-induced NF- $\kappa$ B-driven luciferase activity in monocytes.**  $1 \times 10^5$  THP-1 LUCIA® monocytes were pre-treated for 30 min with sLXms; vehicle or appropriate controls, at indicated concentrations in the presence (LPS-activated) or absence (basal) of 50 ng/mL of LPS. After 24 h supernatants were collected and NF- $\kappa$ B-driven luciferase activity assayed. Concentration-response curves of QNX-sLXms from group A, C and D are here displayed. Data are expressed as %  $\pm$  SEM (n=3) of Normalised Luminescence Unit relative to LPS-induced response. Best fitting curves are indicated by black solid lines. Statistical analysis was carried out by using Student's unpaired 2-tailed T-test of tested compound *vs* LPS (\* =  $p < 0.05$ ; \*\* =  $p < 0.01$ ; \*\*\*  $p < 0.001$ ; \*\*\*\*  $p < 0.0001$ ) or *vs* LXA<sub>4</sub> **1** (not shown).



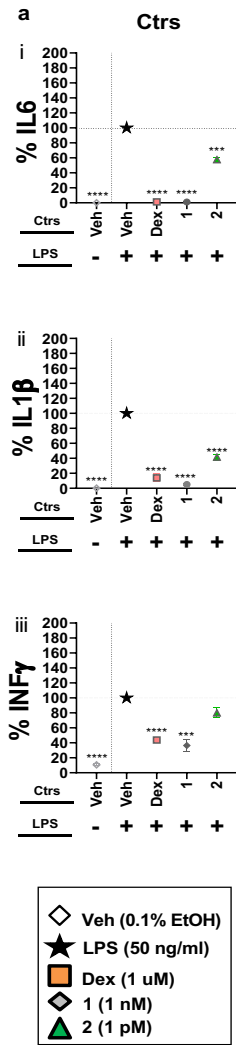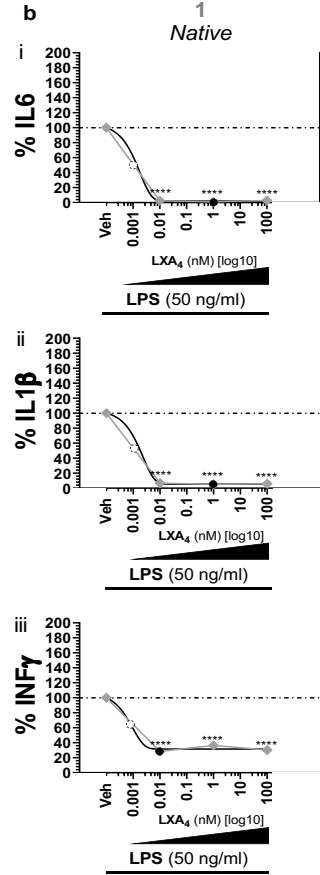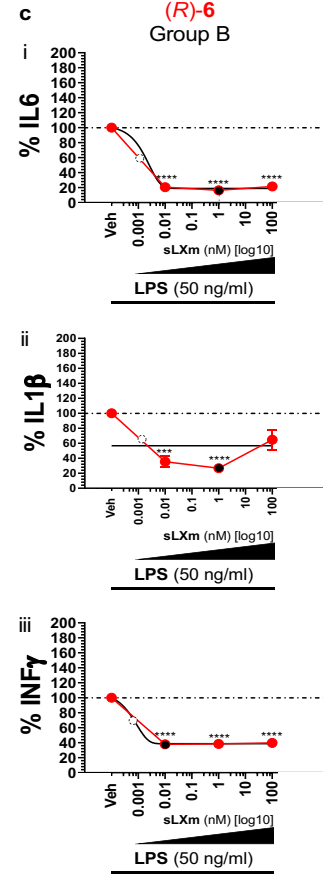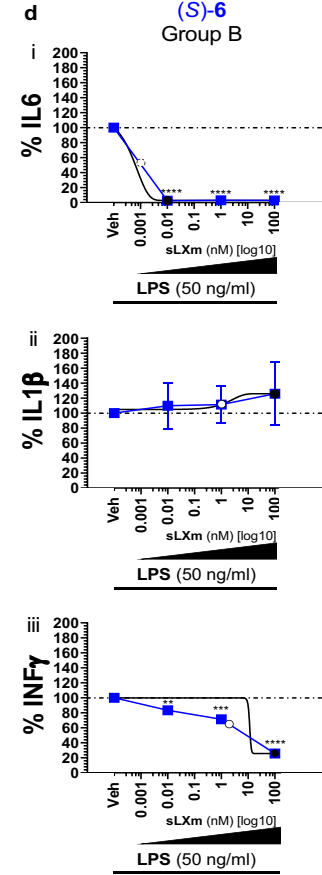

| Cytokine     | LPS-induced release (pg/ml) |
|--------------|-----------------------------|
| IL6          | 3584 $\pm$ 122              |
| IL1 $\beta$  | 1162 $\pm$ 53               |
| INF $\gamma$ | 145 $\pm$ 11                |

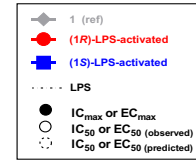

**Supplementary Figure 2. Effect of series (6) of QNX-sLXms on LPS-induced pro-inflammatory cytokine release by monocytes.**  $1 \times 10^5$  THP-1 LUCIA® monocytes were pre-treated for 30 min with sLXms; vehicle or appropriate controls, at indicated concentrations, challenged with 50 ng/mL of LPS. After 24 h supernatants were collected and a panel of 7 pro-inflammatory cytokine levels were assayed: IL-6, IL-1 $\beta$  and IFN- $\gamma$  are shown. (a) Single point analysis of the internal controls. (b) Concentration-response curves of reference [1] and QNX-sLXms from group B are shown. Data are expressed as % cytokine secretion relative to LPS alone  $\pm$  SEM (n=3). Best fitting curves are indicated by black solid lines. Statistical analysis was carried out by using Student's unpaired 2-tailed T-test of tested compound vs LPS (\* =  $p < 0.05$ ; \*\* =  $p < 0.01$ ; \*\*\*  $p < 0.001$ ; \*\*\*\*  $p < 0.0001$ ) or vs LXA<sub>4</sub> 1 (not shown).

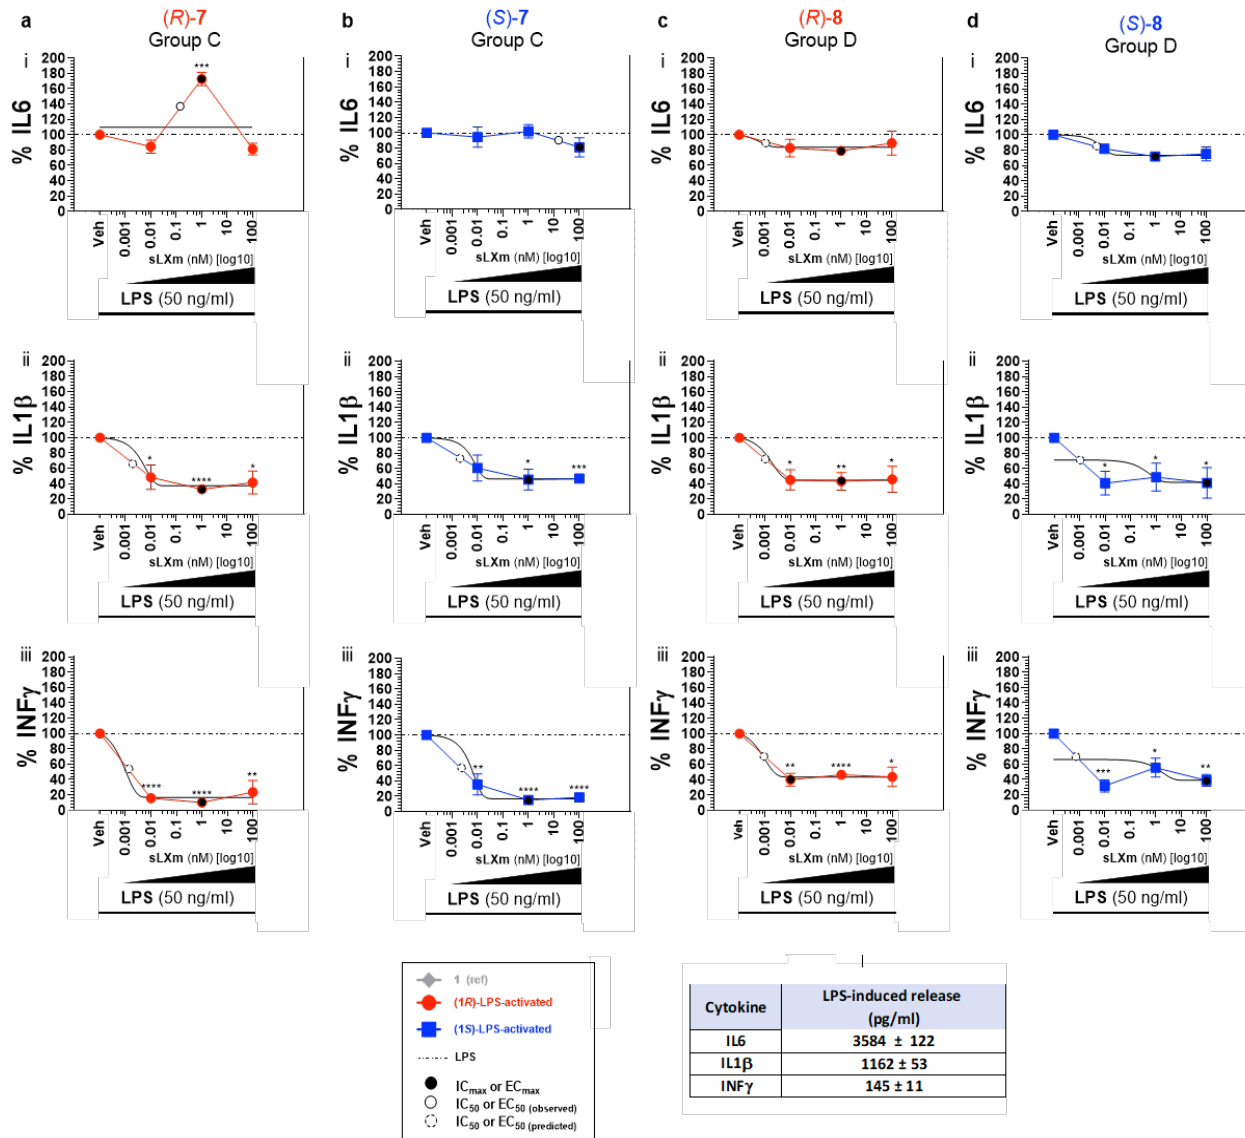

**Supplementary Figure 3. Effect of series (7) and (8) of QNX-sLXms on LPS-induced pro-inflammatory cytokine release in monocytes.**  $1 \times 10^5$  THP-1 LUCIA® monocytes were pre-treated for 30 min with sLXms; vehicle or appropriate controls, at indicated concentrations, challenged with 50 ng/mL of LPS. After 24 h supernatants were collected and a panel of 7 pro-inflammatory cytokine levels were assayed: IL-6, IL-1 $\beta$  and IFN- $\gamma$  are shown. Concentration-response curves of QNX-sLXms from group C and D are displayed. Data are expressed as % cytokine secretion relative to LPS alone  $\pm$  SEM (n=3). Best fitting curves are indicated by black solid lines. Statistical analysis was carried out by using Student's unpaired 2-tailed T-test of tested compound *vs* LPS (\* =  $p < 0.05$ ; \*\* =  $p < 0.01$ ; \*\*\*  $p < 0.001$ ; \*\*\*\*  $p < 0.0001$ ) or *vs* LXA<sub>4</sub> **1** (not shown).

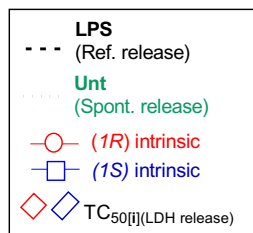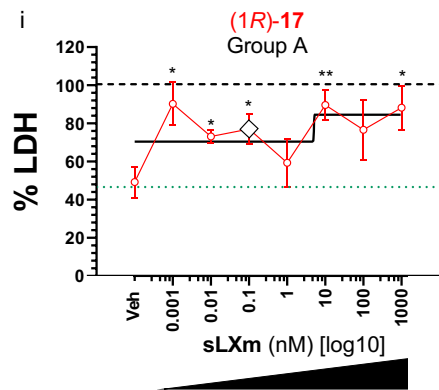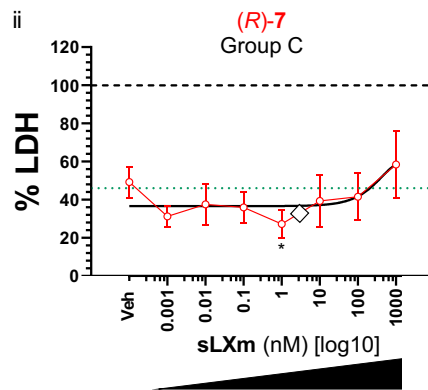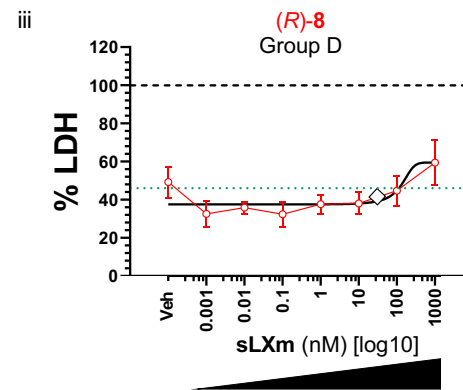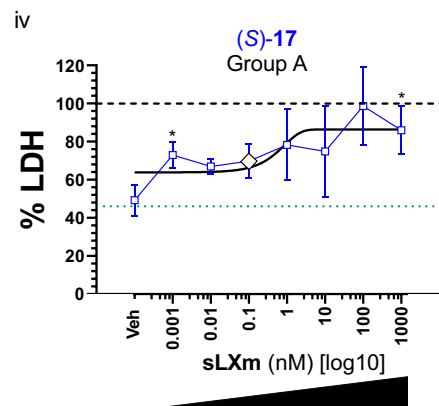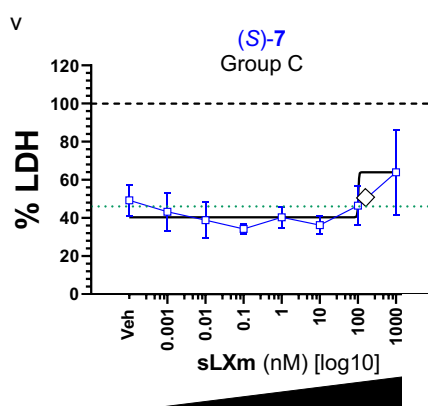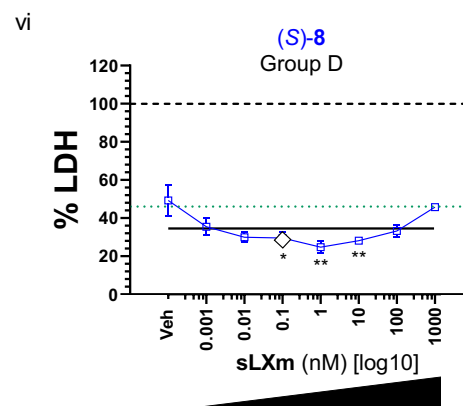

**Supplementary Figure 4 - Intrinsic cytotoxic profile of series (17), (7), (8) of QNX-sLXms.**  $1 \times 10^5$  THP-1 LUCIA® monocytes were treated for 24 h with QNX-sLXms, vehicle or appropriate controls [1 pM - 1  $\mu$ M]. After 24 h, supernatants were collected and LDH release assayed. Concentration-response and best-fitting curves of (17), (7), (8) are shown. Data are expressed as % LDH release relative to LPS  $\pm$  SEM (n=3). Statistical analysis was carried out by using Student's unpaired 2-tailed T-test of tested compound vs LPS (\* =  $p < 0.05$ ; \*\* =  $p < 0.01$ ).

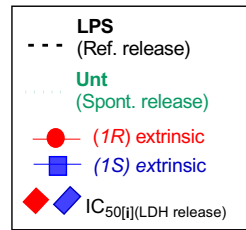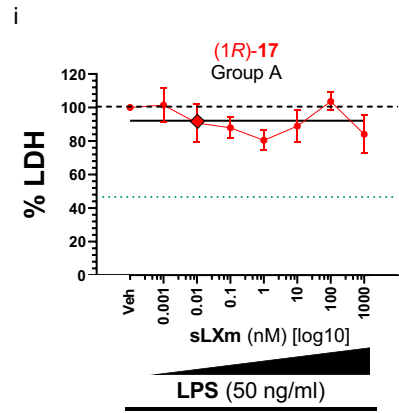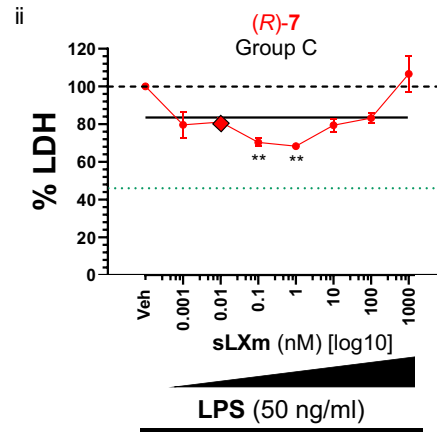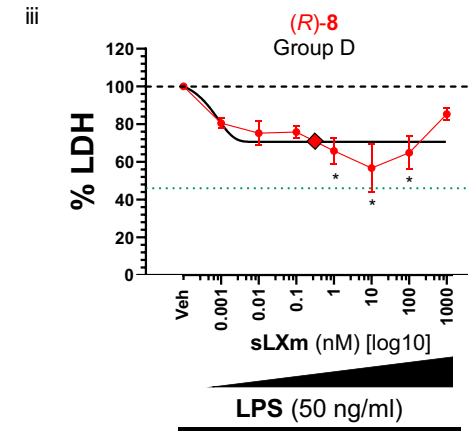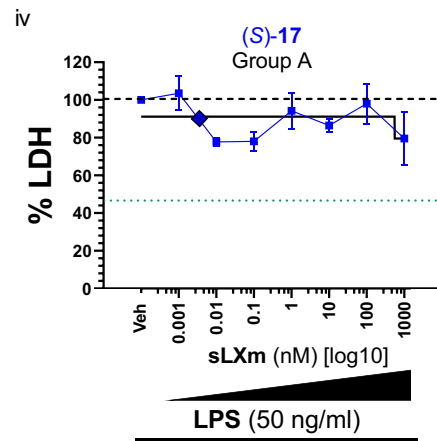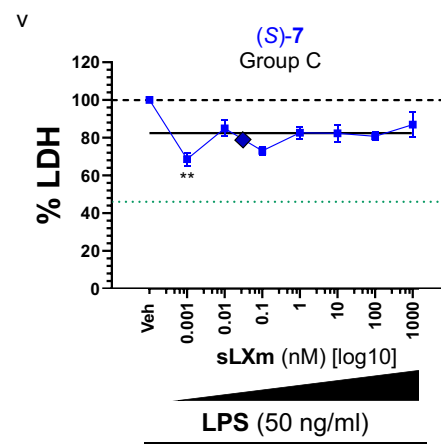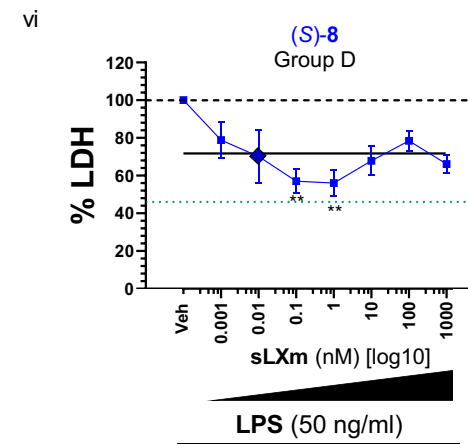

**Supplementary Figure 5 - Extrinsic cytotoxic profile of series (17), (7), (8) of QNX-sLXms.**  $1 \times 10^5$  THP-1 LUCIA® monocytes pre-treated for 30 mins with QNX-sLXms, vehicle or appropriate controls, at increasing doses ranging (1 pM - 1  $\mu$ M), and subsequently challenged for 24 hrs with 50 ng/ml LPS. After 24 h supernatants were collected and LDH release assayed. Concentration-response and best-fitting curves of (17), (7), (8) are shown. Data are expressed as % LDH release relative to LPS  $\pm$  SEM (n=3). Statistical analysis was carried out by using Student's unpaired 2-tailed T-test of tested compound *vs* LPS (\* =  $p < 0.05$ ; \*\* =  $p < 0.01$ ; \*\*\*  $p < 0.001$ ; \*\*\*\*  $p < 0.0001$ ).



a

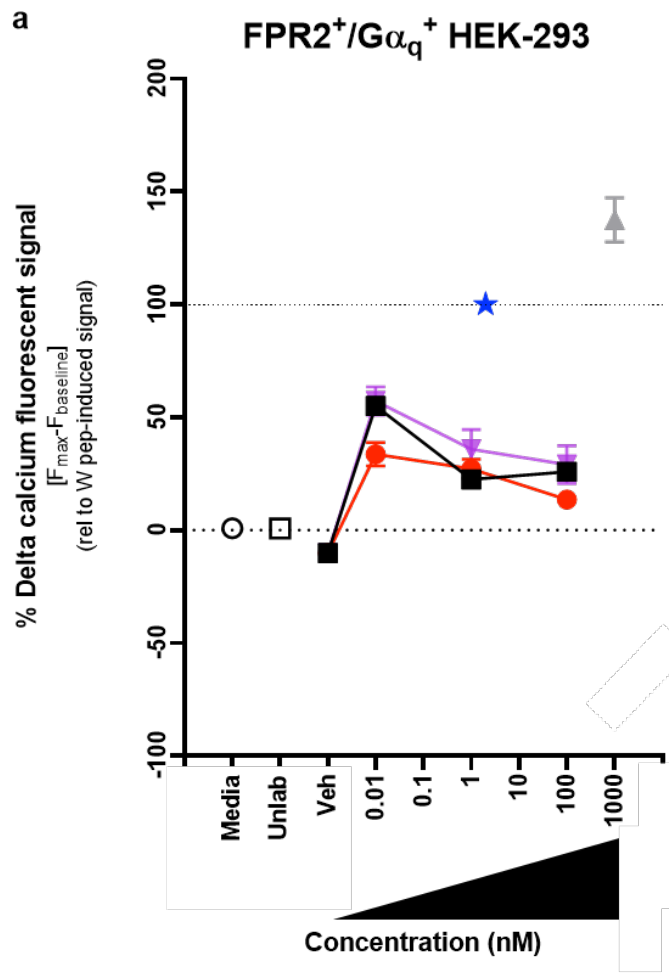

b

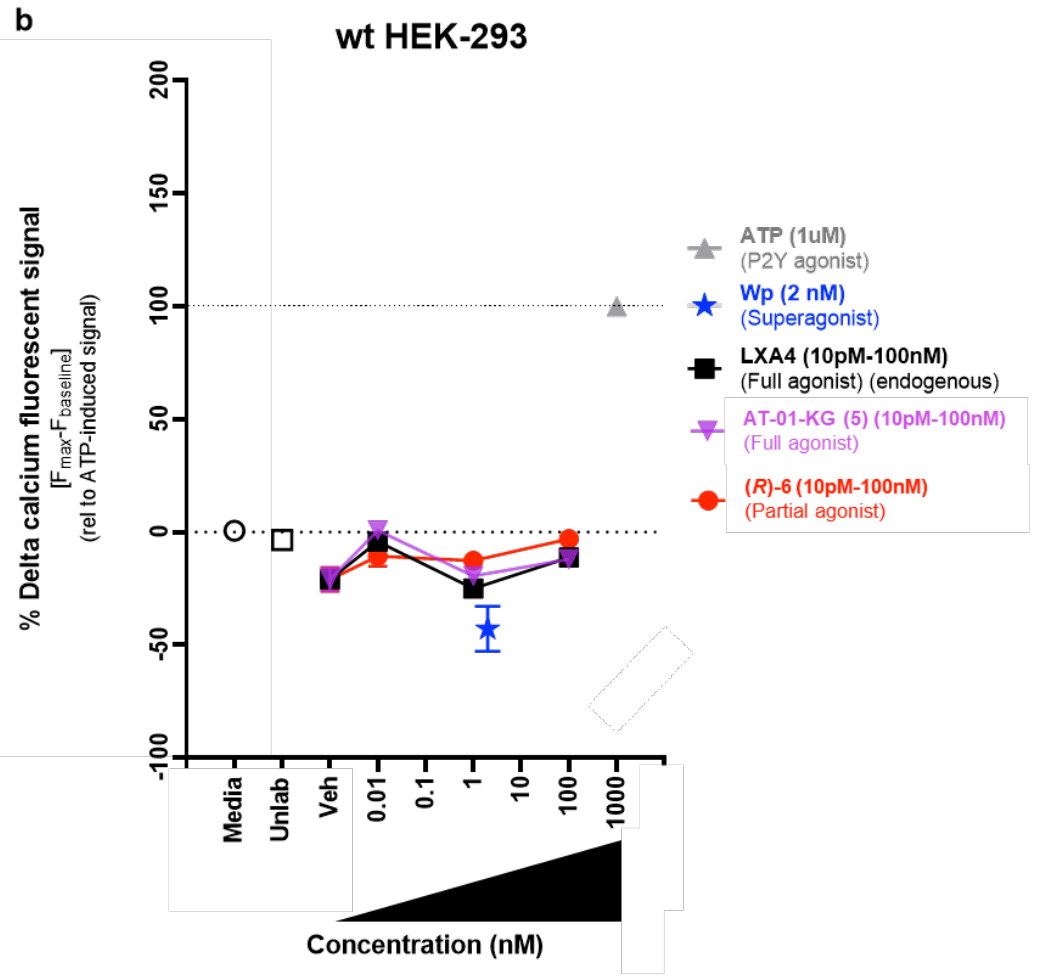

**Supplementary Figure 6 - Cell model for intracellular calcium flux measurement.** Intracellular calcium mobilization was assessed in (a) stably transfected cell line overexpressing ALX/FPR2 and  $G\alpha_q$  as well as (b) in wt system. ATP (1 mM) and Wp (2 nM) were used as controls. Quantification of fluorescent signal was carried out by calculating differential calcium signals at baseline and at peak. Data are expressed as % delta calcium peak relative to the known full agonist ( $1 \pm \text{SEM}$  (n=3)). Statistical analyses were carried out by using Student's unpaired T-test of tested compound vs veh (not shown).

1

**a**

**FPR2<sup>+</sup>/G $\alpha_q$  HEK-293**

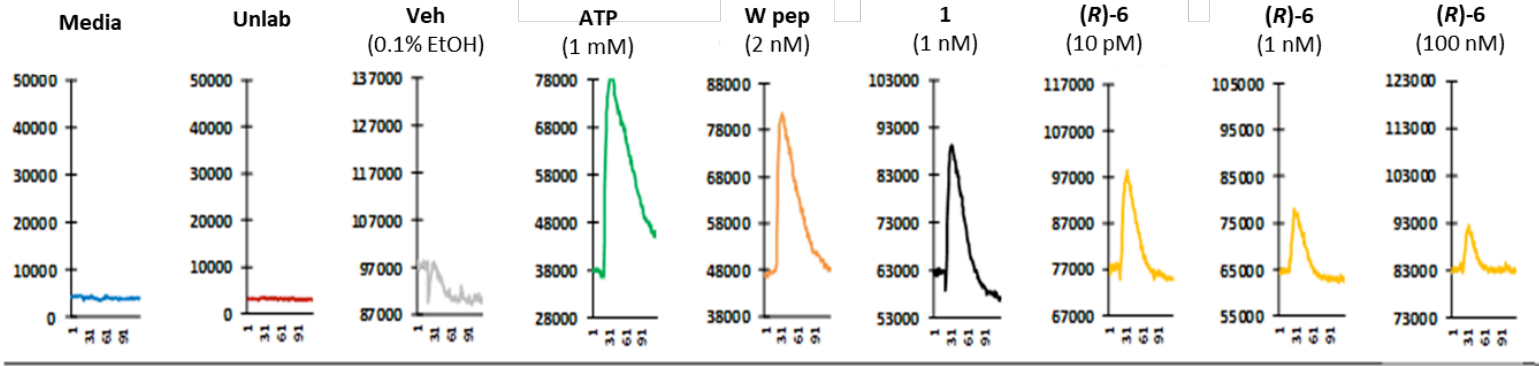

**b**

**wt HEK-293**

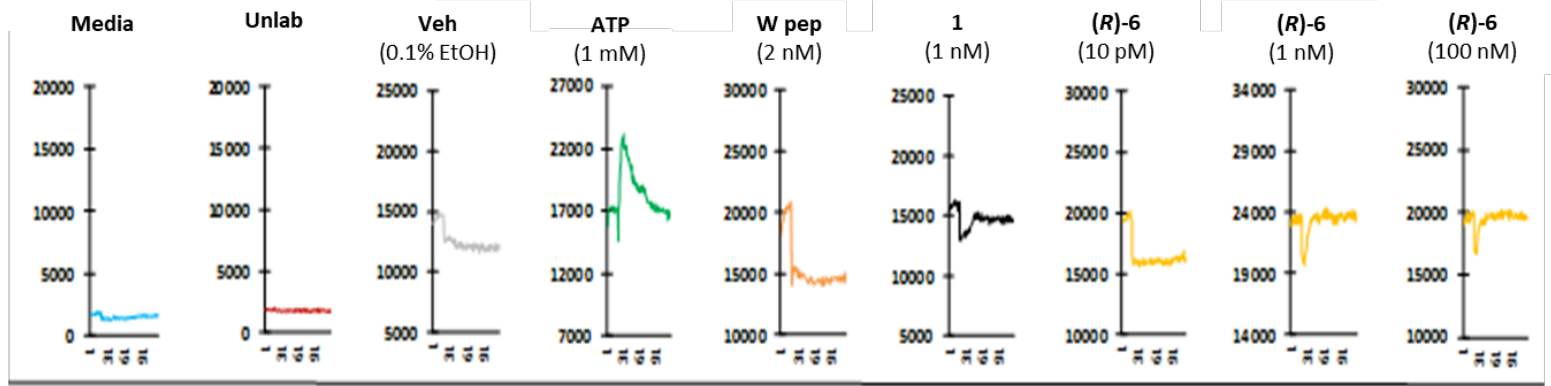

2

**Supplementary Figure 7 - Intracellular calcium flux kinetic traces.** Intracellular calcium mobilization was assessed in stably transfected HEK-293 overexpressing ALX/FPR2 and  $G_{aq}$  (**a**) as well as in the relative wt system (**b**) ATP (P2Y receptor agonist) and Wp (FPR2/ALX agonist) were used as controls. Representative “*baseline + agonist addition*” kinetic steps: the baseline fluorescent signal was measured for 20 s, followed by 100 s immediately after agonist injection. (Subsequent “*Triton + EGTA*” kinetic steps are not shown here). Statistical analyses were carried out by using Student’s unpaired T-test of the mimetic and controls not shown).
